# Supplementary material for: Patterns of Bacillary Dysentery in China, 2005–2010
Source: MDPI journal article supplement (doi:10.3390/ijerph13020164), 2016-01-27
Supplement: s1 [file s1]

## Supplementary Material: Patterns of Bacillary Dysentery in China, 2005–2010

Han Zhang, Yali Si, Xiaofeng Wang and Peng Gong

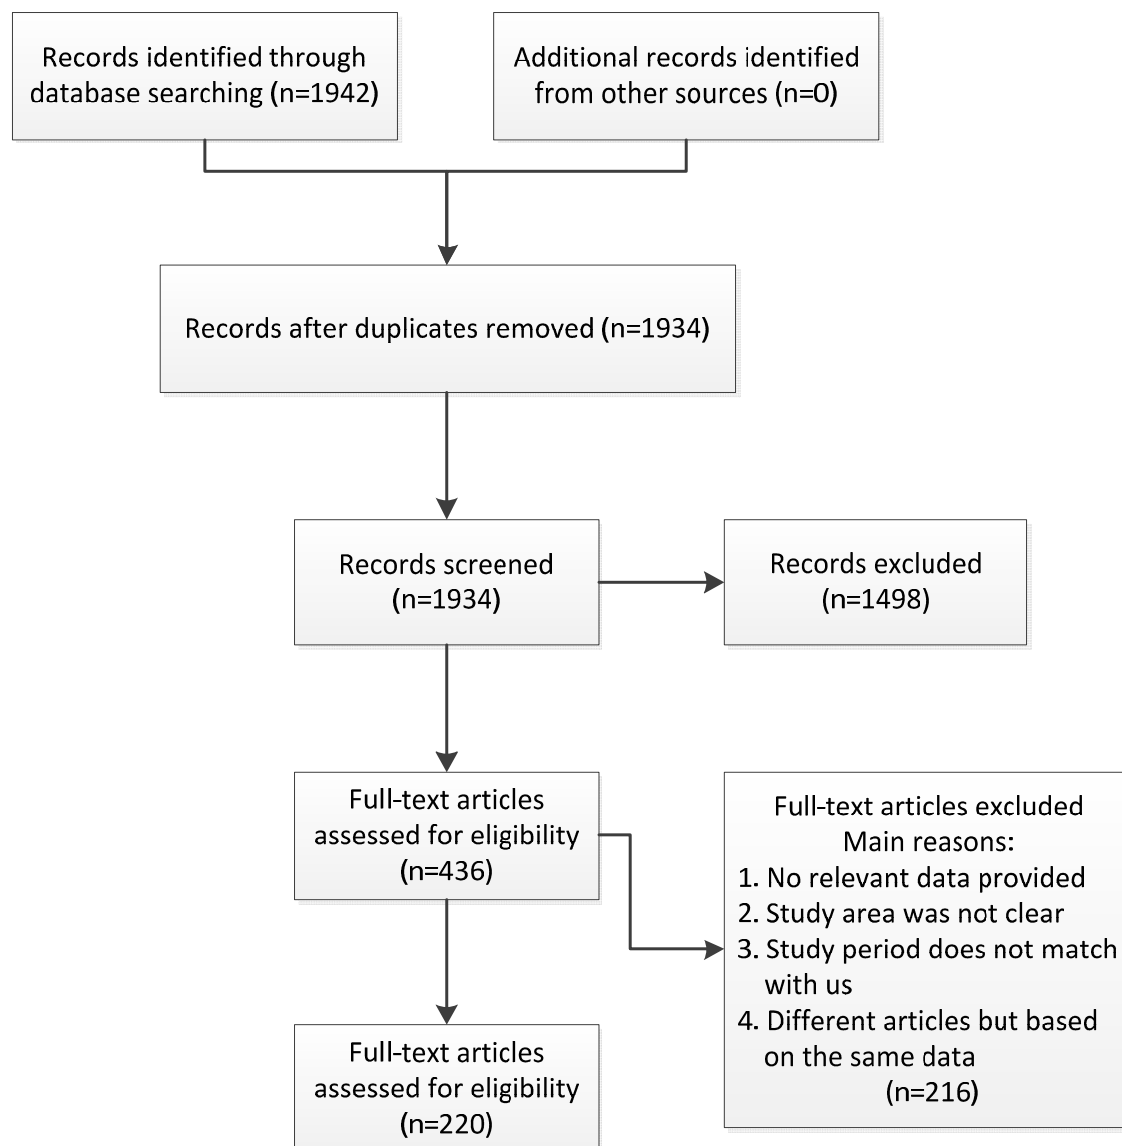

**Figure S1.** Search strategy to identify studies for meta-analysis.

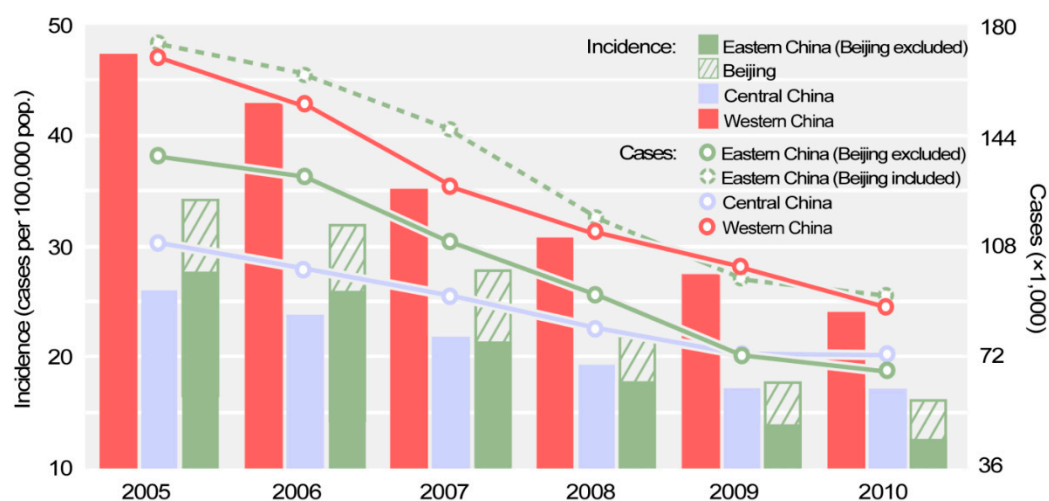

**Figure S2.** Bacillary dysentery incidence and number of cases in China, by geographical region, 2005–2010.

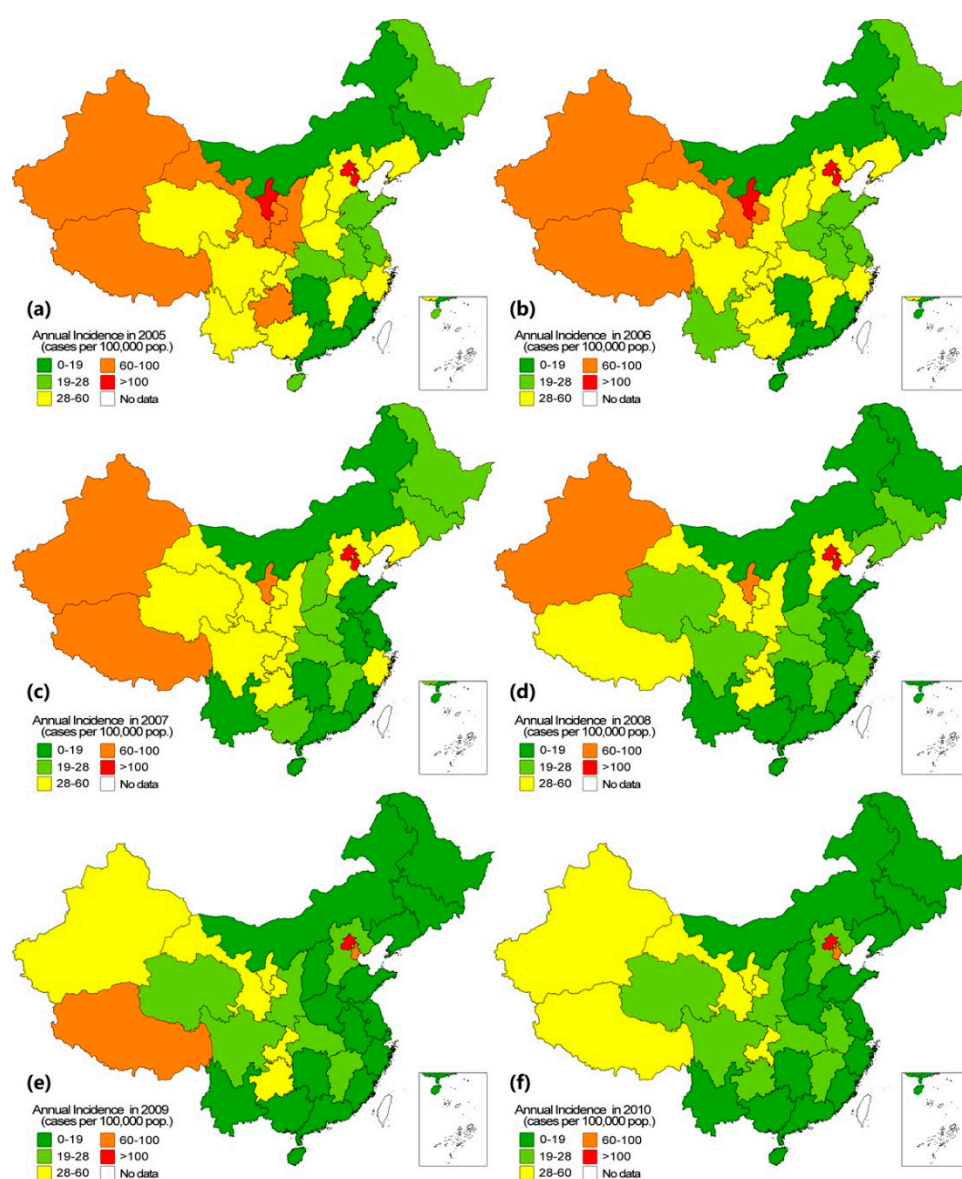

**Figure S3.** Annual incidence of bacillary dysentery for each year, by province, 2005–2010. The map was created using the ArcGIS 10.0 software (ESRI Inc.).

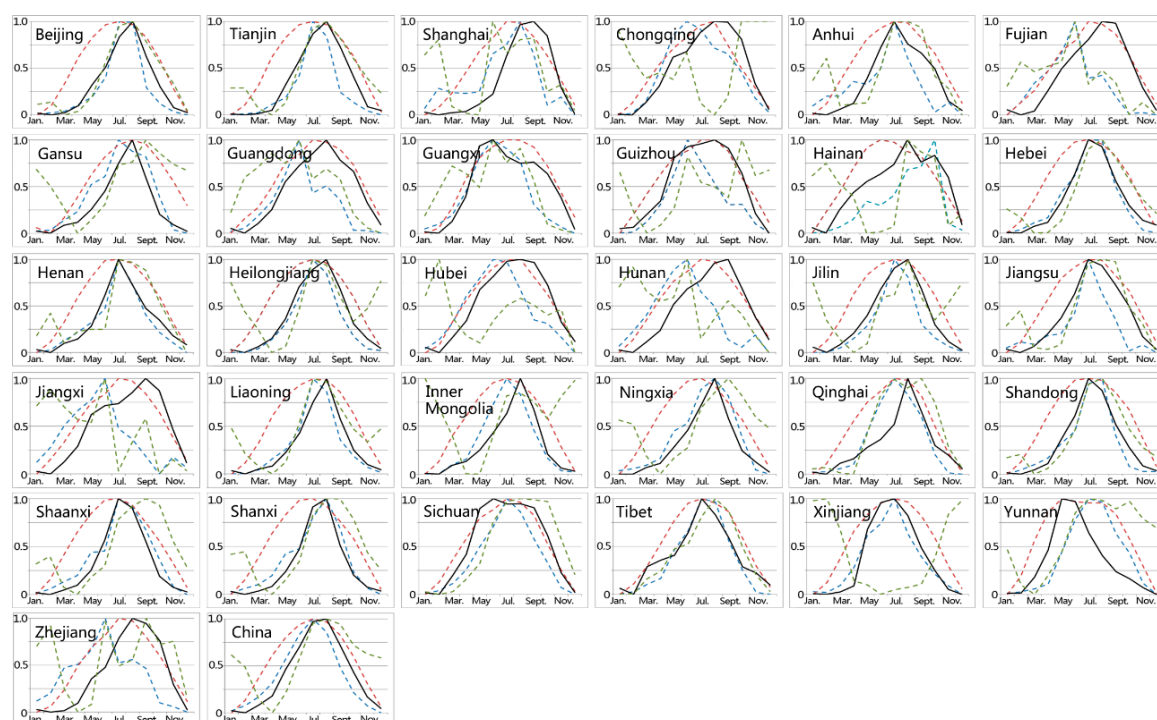

**Figure S4.** Monthly average bacillary dysentery incidence and meteorological factors by provinces, 2005–2010. Black solid line: Monthly bacillary dysentery incidence, Red dotted line: mean monthly temperature, Blue dotted line: mean monthly precipitation, Green dotted line: mean monthly relative humidity. Features are normalized and raw data was shown as follows (province: Incidence/precipitation/temperature/relative humidity (minimum–maximum)) Beijing: Incidence (4.02–36.93), P (1.22–122.00), T (1.07–31.39), RH (41.89–71.96); Tianjin: Incidence (1.69–23.25), P (2.27–147.79), T (1.65–31.17), RH (47.73–74.32); Shanghai: Incidence (0.31–2.54), P (35.43–221.45), T (7.90–33.89), RH (67.92–79.31); Chongqing: Incidence (0.75–2.23), P (15.85–187.65), T (9.38–32.98), RH (74.39–83.12); Anhui: Incidence (0.48–3.70), P (26.74–260.78), T (6.51–31.64), RH (67.02–81.35); Fujian: Incidence (0.26–0.83), P (49.93–349.53), T (14.50–33.00), RH (72.36–82.68); Gansu: Incidence (1.40–13.91), P (1.67–62.56), T (0.33–27.22), RH (39.20–61.79); Guangdong: Incidence (0.43–1.07), P (26.46–260.23), T (16.77–32.15), RH (72.36–82.68); Guangxi: Incidence (0.81–3.06), P (32.42–353.89), T (15.23–33.08), RH (69.37–81.03); Guizhou: Incidence (1.65–5.24), P (21.81–225.20), T (8.93–29.48), RH (72.39–83.12); Hainan: Incidence (0.73–1.88), P (18.30–457.97), T (22.78–33.13), RH (76.21–81.32); Hebei: Incidence (0.80–6.42), P (1.66–116.18), T (−0.18–30.46), RH (46.00–73.31); Henan: Incidence (0.55–4.40), P (7.79–233.91), T (5.78–31.75), RH (58.02–79.83); Heilongjiang: Incidence (0.66–3.08), P (5.76–130.85), T (−12.78–26.86), RH (53.92–76.36); Hubei: Incidence (0.86–3.20), P (16.64–226.67), T (7.91–32.46), RH (69.13–78.43); Hunan: Incidence (0.48–2.38), P (47.16–215.83), T (8.53–33.42), RH (71.14–77.73); Jilin: Incidence (0.66–2.71), P (4.86–150.59), T (−8.08–26.90), RH (51.80–77.05); Jiangsu: Incidence (0.40–2.64), P (26.41–265.642), T (6.20–31.60), RH (66.54–80.96); Jiangxi: Incidence (0.68–3.33), P (38.22–288.47), T (10.07–34.33), RH (71.70–79.89); Liaoning: Incidence (0.64–5.26), P (4.43–177.75), T (−2.90–28.57), RH (54.28–81.78); Inner Mongolia: Incidence (0.43–2.81), P (2.12–60.65), T (−8.44–29.35), RH (36.39–58.70); Ningxia: Incidence (1.38–19.12), P (0.80–55.20), T (0.00–29.20), RH (26.18–68.66); Qinghai: Incidence (0.98–6.20), P (0.99–82.38), T (1.20–20.05), RH (37.49–58.99); Shandong: Incidence (0.34–3.29), P (3.74–196.91), T (3.61–30.18), RH (55.25–82.04); Shaanxi: Incidence (0.95–8.97), P (3.61–142.02), T (3.76–30.09), RH (52.38–77.04); Shanxi: Incidence (0.49–5.45), P (2.11–113.53), T (0.39–29.74), RH (41.99–70.73); Sichuan: Incidence (1.08–3.55), P (5.92–176.20), T (9.26–26.41), RH (57.24–73.69); Tibet: Incidence (1.38–10.61), P (1.36–84.00), T (2.80–21.33), RH (34.12–61.21); Xinjiang: Incidence (0.86–12.69), P (3.38–19.89), T (−3.72–31.43), RH (32.48–61.14); Yunnan: Incidence (0.58–4.30), P (12.60–217.60), T (18.12–27.53), RH (57.78–79.53); Zhejiang: Incidence (0.85–4.43), P (46.11–222.74), T (10.17–34.34), RH (69.40–77.94); China: Incidence (0.75–4.37), P (9.72–110.18), T (1.60–28.24), RH (48.92–63.72).

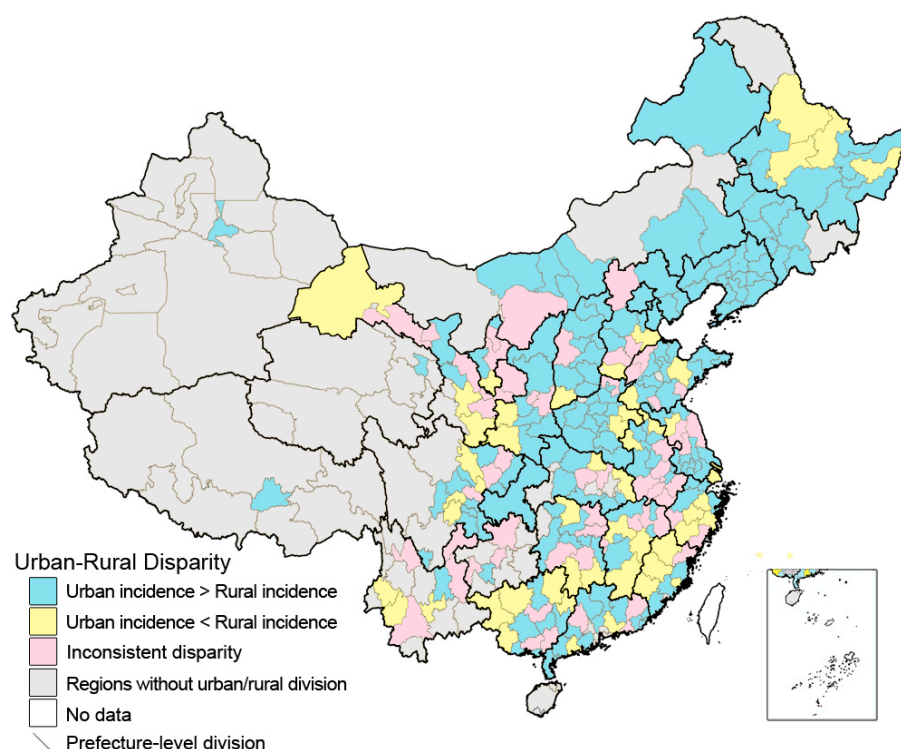

**Figure S5.** Urban-rural disparity of bacillary dysentery incidence in China's cities, 2005–2010. Map was drawn at prefecture-level. Blue: cities had consistently higher urban incidence; Yellow: cities had consistently higher rural incidence; Pink: cities had variable trends of urban-rural disparity; Gray: ethnic autonomous areas or cities without urban/rural divisions; Gray line: boundary of cities, ethnic autonomous areas. The maps were created using the ArcGIS 10.0 software (ESRI Inc.).

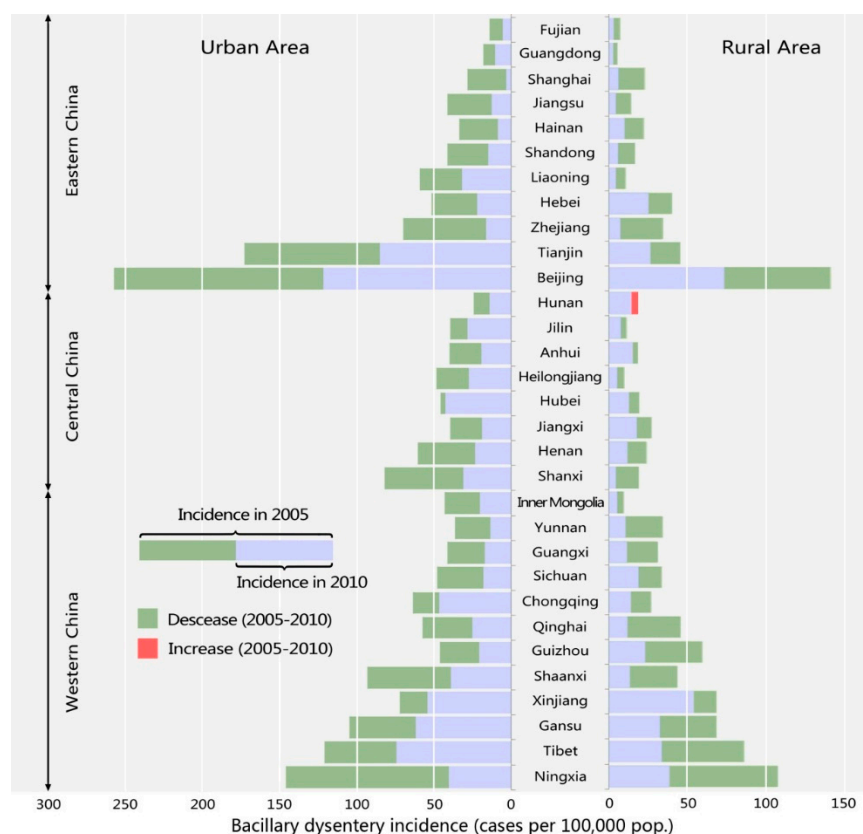

**Figure S6.** Bacillary dysentery incidence and change of incidence in urban and rural area of each province.

**Table S2.** Partial correlation between monthly bacillary dysentery incidence and meteorological factors.

| Climatic Variables | Partial Correlation     |               |                   |
|--------------------|-------------------------|---------------|-------------------|
|                    | Temperature             | Precipitation | Relative Humidity |
| Beijing            | 0.550 (+1) <sup>a</sup> | 0.820 **      | 0.384             |
| Tianjin            | 0.712 * (+1)            | 0.720 *       | 0.555             |
| Shanghai           | 0.667 * (+1)            | 0.776 ** (+1) | 0.315             |
| Chongqing          | 0.835 ** (+1)           | 0.142 (+1)    | −0.560            |
| Anhui              | 0.818 **                | 0.196         | 0.711 *           |
| Fujian             | 0.808 **                | 0.261 (+2)    | −0.320            |
| Gansu              | −0.441 (+1)             | 0.904 **      | 0.616             |
| Guangdong          | 0.826 **                | 0.743 * (+2)  | 0.213             |
| Guangxi            | 0.887 **                | 0.639 *       | −0.549            |
| Guizhou            | 0.858 **                | 0.093 (+1)    | 0.476             |
| Hainan             | 0.820 ** (+1)           | 0.420         | 0.313             |
| Hebei              | 0.740*                  | 0.900 **      | 0.641 *           |
| Henan              | 0.233                   | 0.833 **      | 0.094             |
| Heilongjiang       | 0.753* (+1)             | 0.900 **      | 0.152             |
| Hubei              | 0.757 **                | 0.329 (+1)    | 0.118             |
| Hunan              | 0.900 ** (+1)           | 0.545 (+2)    | 0.454             |
| Jilin              | 0.712 * (+1)            | 0.878 *       | 0.151             |
| Jiangsu            | 0.933 **                | 0.526 *       | 0.811 **          |
| Jiangxi            | 0.766 ** (+1)           | −0.102 (+3)   | 0.436             |
| Liaoning           | 0.488 (+1)              | 0.785 **      | 0.416             |
| Inner Mongolia     | 0.489 (+1)              | 0.712 *       | 0.355             |
| Ningxia            | 0.206 (+1)              | 0.980 **      | 0.712 *           |
| Qinghai            | 0.354 (+1)              | 0.763 ** (+1) | −0.592            |
| Shaanxi            | −0.118                  | 0.820 **      | −0.279            |
| Shandong           | 0.801 **                | 0.876 **      | 0.428             |
| Shanxi             | 0.008 (+1)              | 0.880 **      | 0.191             |
| Sichuan            | 0.781 **                | −0.065        | 0.228             |
| Tibet              | 0.298                   | 0.738 *       | −0.016            |
| Xinjiang           | 0.374                   | 0.828 **      | 0.364             |
| Yunnan             | 0.694 *                 | 0.022         | −0.074            |
| Zhejiang           | 0.779 ** (+1)           | −0.084 (+2)   | 0.166             |

\*\* Significant at 0.01 level; \* Significant at 0.05 level; <sup>a</sup> (+n) means *n* month (s) prior.

**Table S3.** Comparisons of environmental factors between high-risk counties and surrounding low-risk ones.

| Environmental Factors                                       | High-Risk Counties (95% CI) | Low-Risk Counties (95% CI) | p-Value <sup>a</sup> |
|-------------------------------------------------------------|-----------------------------|----------------------------|----------------------|
| <b>Sichuan (compared with eastern Sichuan) <sup>b</sup></b> | <b>n = 47 <sup>c</sup></b>  | <b>n = 125</b>             |                      |
| Mean annual temperature (°C)                                | 12.05 (10.72, 13.37)        | 16.87 (16.62, 17.13)       | 0.000 **             |
| Summer average temperature (°C)                             | 16.59 (15.45, 17.73)        | 25.49 (25.04, 25.93)       | 0.000 **             |
| Monthly average precipitation (mm)                          | 68.71 (64.65, 72.77)        | 84.02 (81.32, 86.73)       | 0.000 **             |
| Mean annual relative humidity (%)                           | 63.96 (61.64, 66.28)        | 76.04 (75.37, 76.71)       | 0.000 **             |
| Elevation (mean) (m)                                        | 1652.75 (1435.92, 1869.58)  | 482.29 (422.60, 541.98)    | 0.000 **             |
| Elevation (s.d.) <sup>c</sup>                               | 1361.36 (1209.44, 1513.28)  | 307.69 (252.64, 362.73)    | 0.000 **             |
| Slope (degree)                                              | 22.80 (21.37, 24.23)        | 9.87 (8.64, 11.10)         | 0.000 **             |
| Drainage density (m/km <sup>2</sup> ) <sup>d</sup>          | 46.04 (37.32, 54.77)        | 53.61 (47.01, 60.21)       | 0.152                |
| GRP2010 (billion Yuan)                                      | 3.36 (1.91, 4.81)           | 12.32 (10.46, 14.18)       | 0.000 **             |
| <b>Sichuan (compared with western Sichuan)</b>              | <b>n = 47</b>               | <b>n = 9</b>               |                      |
| Mean annual temperature (°C)                                | 12.05 (10.72, 13.37)        | 5.79 (2.96, 8.61)          | 0.001 **             |
| Summer average temperature (°C)                             | 16.59 (15.45, 17.73)        | 10.80 (9.42, 12.18)        | 0.001 **             |
| Monthly average precipitation (mm)                          | 68.71 (64.65, 72.77)        | 50.35 (46.35, 54.36)       | 0.000 **             |
| Mean annual relative humidity (%)                           | 63.96 (61.64, 66.28)        | 54.51 (50.65, 58.37)       | 0.003 **             |
| Elevation (mean) (m)                                        | 1652.75 (1435.92, 1869.58)  | 2161.39 (1680.95, 2641.82) | 0.066                |
| Elevation (s.d.)                                            | 1361.36 (1209.44, 1513.28)  | 2082.97 (2018.41, 2147.53) | 0.000 **             |
| Slope (degree)                                              | 22.80 (21.37, 24.23)        | 19.92 (17.33, 22.51)       | 0.107                |
| Drainage density (m/km <sup>2</sup> )                       | 46.04 (37.32, 54.77)        | 48.62 (36.21, 61.02)       | 0.830                |
| GRP2010 (billion Yuan)                                      | 3.36 (1.91, 4.81)           | 0.45 (0.35, 0.55)          | 0.001 **             |
| <b>Tibet</b>                                                | <b>n = 17</b>               | <b>n = 48</b>              |                      |
| Mean annual temperature (°C)                                | 8.65 (7.72, 9.59)           | 5.37 (4.64, 6.10)          | 0.000 **             |
| Summer average temperature (°C)                             | 13.38 (10.81, 15.96)        | 10.27 (9.62, 10.93)        | 0.010 **             |
| Monthly average precipitation (mm)                          | 41.55 (36.22, 46.88)        | 36.67 (34.10, 39.24)       | 0.101                |
| Mean annual relative humidity (%)                           | 51.35 (46.62, 56.08)        | 46.35 (44.15, 48.55)       | 0.049 *              |
| Elevation (mean) (m)                                        | 4184.45 (3783.94, 4584.97)  | 4744.59 (4667.25, 4821.93) | 0.000 **             |
| Elevation (s.d.)                                            | 700.52 (529.22, 871.82)     | 447.28 (412.65, 481.91)    | 0.000 **             |
| Slope (degree)                                              | 23.10 (21.10, 25.11)        | 17.72 (16.30, 19.13)       | 0.000 **             |
| Drainage density (m/km <sup>2</sup> )                       | 24.33 (17.58, 31.08)        | 29.10 (26.26, 31.95)       | 0.121                |
| GRP2010 (billion Yuan)                                      | 0.62 (0.26, 0.99)           | 0.59 (0.40, 0.78)          | 0.464                |
| <b>Yunnan</b>                                               | <b>n = 7</b>                | <b>n = 122</b>             |                      |
| Mean annual temperature (°C)                                | 13.12 (9.68, 16.55)         | 17.44 (17.00, 17.88)       | 0.000 **             |
| Summer average temperature (°C)                             | 19.86 (17.10, 22.62)        | 22.44 (22.09, 22.79)       | 0.039 *              |
| Monthly average precipitation (mm)                          | 82.73 (57.51, 107.95)       | 84.59 (80.70, 88.49)       | 0.975                |
| Mean annual relative humidity (%)                           | 67.59 (62.94, 72.24)        | 70.36 (69.48, 71.29)       | 0.169                |
| Elevation (mean) (m)                                        | 2999.76 (2575.22, 3424.29)  | 1747.99 (1673.75, 1822.24) | 0.000 **             |
| Elevation (s.d.)                                            | 661.26 (599.84, 722.69)     | 338.98 (316.16, 361.80)    | 0.000 **             |
| Slope (degree)                                              | 27.28 (24.04, 30.52)        | 15.91 (15.16, 16.67)       | 0.000 **             |
| Drainage density (m/km <sup>2</sup> )                       | 44.97 (35.36, 54.59)        | 38.88 (34.76, 43.01)       | 0.377                |
| GRP2010 (billion Yuan)                                      | 1.86 (0.46, 3.26)           | 5.93 (4.43, 7.43)          | 0.009 **             |
| <b>Gansu (south)</b>                                        | <b>n = 8</b>                | <b>n = 19</b>              |                      |
| Mean annual temperature (°C)                                | 5.24 (2.09, 8.39)           | 9.15 (7.68, 10.62)         | 0.002 **             |
| Summer average temperature (°C)                             | 15.60 (12.40, 18.79)        | 20.28 (18.97, 21.58)       | 0.002 **             |
| Monthly average precipitation (mm)                          | 46.67 (42.86, 50.49)        | 43.23 (41.36, 45.11)       | 0.057                |
| Mean annual relative humidity (%)                           | 63.26 (61.08, 65.45)        | 65.02 (63.36, 66.67)       | 0.056                |
| Elevation (mean) (meter)                                    | 2163.02 (1481.73, 2844.30)  | 1315.92 (1087.88, 1543.97) | 0.002 **             |
| Elevation (s.d.)                                            | 1241.12 (705.90, 1776.34)   | 998.55 (837.48, 1159.62)   | 0.044 **             |
| Slope (degree)                                              | 18.22 (12.90, 23.53)        | 15.92 (13.36, 18.50)       | 0.345                |
| Drainage density (m/km <sup>2</sup> )                       | 24.93 (17.52, 32.33)        | 31.26 (22.56, 39.96)       | 0.030 *              |
| GRP2010 (billion Yuan)                                      | 0.83 (0.55, 1.12)           | 1.97 (1.36, 2.57)          | 0.006 **             |

Table S3. Cont.

| Environmental Factors                 | High-Risk Counties (95% CI) | Low-Risk Counties (95% CI) | <i>p</i> -Value <sup>a</sup> |
|---------------------------------------|-----------------------------|----------------------------|------------------------------|
| <b>Gansu (north)</b>                  | <b><i>n</i> = 5</b>         | <b><i>n</i> = 9</b>        |                              |
| Mean annual temperature (°C)          | 7.72 (5.92, 9.51)           | 7.36 (5.90, 8.82)          | 0.739                        |
| Summer average temperature (°C)       | 22.86 (20.03, 25.69)        | 21.83 (19.82, 23.83)       | 0.472                        |
| Monthly average precipitation (mm)    | 5.46 (3.57, 7.35)           | 14.60 (9.32, 19.88)        | 0.006 **                     |
| Mean annual relative humidity (%)     | 40.81 (36.01, 45.61)        | 49.72 (47.91, 51.50)       | 0.004 **                     |
| Elevation (mean) (m)                  | 1265.12 (707.86, 1822.39)   | 1418.35 (784.37, 2052.33)  | 0.947                        |
| Elevation (s.d.)                      | 990.99 (381.02, 1600.96)    | 584.35 (285.15, 883.55)    | 0.162                        |
| Slope (degree)                        | 3.77 (0.80, 6.75)           | 4.88 (0.77, 8.98)          | 0.841                        |
| Drainage density (m/km <sup>2</sup> ) | 14.64 (4.55, 24.72)         | 28.07 (21.38, 34.76)       | 0.014 *                      |
| GRP2010 (billion Yuan)                | 4.56 (0.67, 9.57)           | 4.71 (1.69, 7.74)          | 0.947                        |
| <b>Xinjiang</b>                       | <b><i>n</i> = 48</b>        | <b><i>n</i> = 50</b>       |                              |
| Mean annual temperature (°C)          | 8.83 (7.92, 9.74)           | 9.28 (8.44, 10.12)         | 0.593                        |
| Summer average temperature (°C)       | 23.71 (22.70, 24.73)        | 24.33 (23.80, 24.86)       | 0.826                        |
| Monthly average precipitation (mm)    | 13.57 (11.03, 16.10)        | 11.95 (9.88, 14.02)        | 0.062                        |
| Mean annual relative humidity (%)     | 51.53 (49.27, 53.79)        | 51.27 (49.11, 53.42)       | 0.895                        |
| Elevation (mean) (m)                  | 1530.83 (1288.02, 1773.63)  | 1532.71 (1279.41, 1786.02) | 0.541                        |
| Elevation (s.d.)                      | 638.17 (521.66, 754.68)     | 601.36 (456.91, 745.81)    | 0.893                        |
| Slope (degree)                        | 7.58 (5.88, 9.28)           | 6.09 (4.68, 7.49)          | 0.241                        |
| Drainage density (m/km <sup>2</sup> ) | 22.99 (17.77, 28.21)        | 24.73 (18.12, 31.34)       | 0.876                        |
| GRP2010 (billion Yuan)                | 4.62 (3.49, 5.76)           | 5.63 (3.20, 8.05)          | 0.524                        |

\*\* Significant at 0.01 level; \* Significant at 0.05 level; <sup>a</sup> Data were tested for normality using Shapiro-Wilk Test. If the data were approximately normally distributed, a Two-tailed T Test was conducted to compare the environmental variables between high incidence areas and surrounding low incidence areas. Otherwise, a non-parametric Mann-Whitney U Test was used instead. Bonferroni correction had been performed for multiple tests of statistical significance on the same data in Sichuan province, and the *P*-Values had been corrected; <sup>b</sup> High-risk regions in Sichuan located in the middle part of Sichuan, while eastern and western parts of Sichuan are low-risk regions. As climatic factors, geographical factors, social factors are quite different between eastern and western Sichuan, we compared environmental variables between the middle high-risk regions and low-risk regions in eastern and western Sichuan separately; <sup>c</sup> Standard deviation of elevation of each spatial unit, which presents the topographic fluctuation; <sup>d</sup> Total length of rivers per unit area; <sup>e</sup> *n*, number of counties or districts involved in comparison.

**Table S4.** Prevalence of major causative species of shigellosis in mainland China, 2005–2010.

|                        | No. of Studies | No. of Isolates | <i>S. flexneri</i>     |                       |                    |          | <i>S. sonnei</i>       |          |                    |          |
|------------------------|----------------|-----------------|------------------------|-----------------------|--------------------|----------|------------------------|----------|--------------------|----------|
|                        |                |                 | Prevalence (95 CI) (%) | <i>n</i> <sup>a</sup> | Heterogeneity Test |          | Prevalence (95 CI) (%) | <i>n</i> | Heterogeneity Test |          |
|                        |                |                 |                        |                       | I <sup>2</sup> (%) | <i>p</i> |                        |          | I <sup>2</sup> (%) | <i>p</i> |
| Stratified by Province |                |                 |                        |                       |                    |          |                        |          |                    |          |
| Beijing                | 42             | 8328            | 39.7% (35.4–44.1%)     | 3704                  | 92.1               | 0        | 58.8% (54.1–63.2%)     | 4528     | 92.5               | 0        |
| Tianjin                | 4              | 231             | 52.0% (45.5–58.4%)     | 120                   | 31.0               | 0.23     | 47.1% (40.7–53.6%)     | 109      | 25.6               | 0.26     |
| Shanghai               | 27             | 9409            | 61.5% (56.8–66.1%)     | 5406                  | 94.8               | 0        | 38.4% (33.9–43.2%)     | 4002     | 94.8               | 0        |
| Chongqing              | 1              | 119             | 87.4% (80.1–92.3%)     | 104                   | 0                  | 1.00     | 12.6% (7.7–19.9%)      | 15       | 0                  | 1.00     |
| Anhui                  | 12             | 1323            | 84.3% (75.1–90.6%)     | 1142                  | 90.6               | 0        | 14.6% (8.6–23.6%)      | 167      | 90.5               | 0        |
| Fujian                 | 12             | 428             | 37.5% (33.0–42.3%)     | 160                   | 2.8                | 0.42     | 62.5% (57.7–67.0%)     | 268      | 2.8                | 0.42     |
| Gansu                  | 12             | 3181            | 64.3% (56.8–71.2%)     | 1930                  | 92.4               | 0        | 33.4% (26.4–41.3%)     | 1177     | 93.3               | 0        |
| Guangdong              | 6              | 512             | 77.4% (67.7–84.8%)     | 389                   | 73.1               | 0        | 17.6% (10.6–27.9%)     | 110      | 77.7               | 0        |
| Guangxi                | 1              | 117             | 86.3% (78.8–91.5%)     | 101                   | 0                  | 1.00     | 13.7% (8.5–21.2%)      | 16       | 0                  | 1.00     |
| Guizhou                | 11             | 519             | 36.8% (23.2–53.0%)     | 200                   | 85.1               | 0        | 62.4% (46.7–75.9%)     | 317      | 84.6               | 0        |
| Hebei                  | 5              | 403             | 74.6% (70.0–78.6%)     | 302                   | 36.7               | 0.18     | 22.6% (18.7–27.0%)     | 90       | 0                  | 0.44     |
| Heilongjiang           | 24             | 4020            | 70.6% (62.3–77.7%)     | 3298                  | 90.8               | 0        | 26.9% (20.2–35.0%)     | 685      | 86.5               | 0        |
| Henan                  | 4              | 142             | 81.8% (76.5–86.1%)     | 102                   | 54.0               | 0.09     | 17.3% (13.7–21.5%)     | 37       | 3.34               | 0.38     |
| Hubei                  | 1              | 37              | 78.4% (62.4–88.8%)     | 29                    | 0                  | 1.00     | 21.6% (11.2–37.6%)     | 8        | 91.4               | 0        |
| Hunan                  | 1              | 120             | 85.0% (77.4–90.3%)     | 102                   | 0                  | 1.00     | 10.8% (6.4–17.8%)      | 13       | 0                  | 1.00     |
| Inner Mongolia         | 2              | 125             | 81.6% (73.8–87.5%)     | 102                   | 0                  | 0.85     | 18.4% (12.5–26.2%)     | 23       | 0                  | 0.85     |
| Jiangsu                | 17             | 4997            | 69.9% (65.0–74.5%)     | 3565                  | 89.7               | 0        | 28.8% (24.3–33.8%)     | 1405     | 90.0               | 0        |
| Jiangxi                | 2              | 277             | 75.2% (30.2–95.5%)     | 188                   | 97.0               | 0        | 16.8% (7.2–34.5%)      | 52       | 86.9               | 0        |
| Jilin                  | 2              | 114             | 74.2% (32.8–94.5%)     | 84                    | 93.1               | 0        | 11.4% (6.8–18.7%)      | 13       | 0                  | 0.78     |
| Liaoning               | 3              | 134             | 55.1% (35.8–72.9%)     | 75                    | 77.6               | 0.01     | 41.7% (20.1–67.1%)     | 55       | 86.2               | 0        |
| Ningxia                | 1              | 89              | 76.4% (66.5–84.1%)     | 68                    | 0                  | 1.00     | 23.6% (15.9–33.5%)     | 21       | 0                  | 1.00     |
| Qinghai                | 5              | 319             | 79.5% (74.7–83.7%)     | 255                   | 17.2               | 0.31     | 20.5% (16.3–25.3%)     | 64       | 17.2               | 0.31     |
| Shaanxi                | 8              | 1118            | 76.3% (61.5–86.6%)     | 922                   | 91.0               | 0        | 13.3% (5.4–29.2%)      | 122      | 93.5               | 0        |
| Shandong               | 11             | 2086            | 82.3% (76.6–86.8%)     | 1612                  | 89.0               | 0        | 15.7% (12.1–20.2%)     | 400      | 83.8               | 0        |
| Shanxi                 | 8              | 431             | 81.1% (73.9–86.6%)     | 346                   | 51.4               | 0.04     | 18.9% (13.4–26.1%)     | 85       | 51.4               | 0.05     |
| Tibet                  | 2              | 50              | 97.9% (86.4–99.7%)     | 50                    | 0                  | 0.65     | 2.1% (0.3–13.6%)       | 0        | 0                  | 0.65     |
| Xinjiang               | 8              | 1315            | 86.6% (77.2–92.5%)     | 1188                  | 89.7               | 0        | 9.2% (5.2–15.8%)       | 98       | 85.3               | 0        |
| Yunnan                 | 2              | 246             | 96.3% (25.9–99.9%)     | 225                   | 89.5               | 0        | 3.5% (0.1–70.5%)       | 19       | 88.8               | 0        |
| Zhejiang               | 26             | 2111            | 63.0% (55.6–69.9%)     | 1254                  | 89.4               | 0        | 34.9% (28.2–42.4%)     | 824      | 89.5               | 0        |



Table S4. Cont.

|                               | No. of Studies | No. of Isolates | <i>S. flexneri</i>     |                       |                    |          | <i>S. sonnei</i>       |          |                    |          |
|-------------------------------|----------------|-----------------|------------------------|-----------------------|--------------------|----------|------------------------|----------|--------------------|----------|
|                               |                |                 | Prevalence (95 CI) (%) | <i>n</i> <sup>a</sup> | Heterogeneity Test |          | Prevalence (95 CI) (%) | <i>n</i> | Heterogeneity Test |          |
|                               |                |                 |                        |                       | I <sup>2</sup> (%) | <i>p</i> |                        |          | I <sup>2</sup> (%) | <i>p</i> |
| Stratified by Geographic Area |                |                 |                        |                       |                    |          |                        |          |                    |          |
| East                          | 105            | 20354           | 64.5% (53.5%–77.9%)    | 13139                 | 96.7               | 0        | 29.5% (19.7%–44.3%)    | 7066     | 97.5               | 0        |
| North                         | 61             | 9518            | 63.5% (50.1%–80.6%)    | 4574                  | 97.4               | 0        | 30.0% (19.0%–47.2%)    | 4835     | 97.3               | 0        |
| Central                       | 28             | 4454            | 82.6% (79.0%–86.5%)    | 3617                  | 0                  | 0.78     | 16.3% (12.9%–20.6%)    | 758      | 15.0               | 0.32     |
| South                         | 7              | 629             | 82.4% (74.2%–91.6%)    | 490                   | 60.2               | 0.11     | 15.4% (11.1%–21.4%)    | 126      | 0                  | 0.45     |
| Northwest                     | 34             | 6022            | 76.7% (69.9%–84.1%)    | 4363                  | 72.2               | 0.01     | 19.7% (13.4%–29.0%)    | 1482     | 83.1               | 0        |
| Southwest                     | 16             | 934             | 80.9% (66.2%–98.8%)    | 579                   | 83.7               | 0        | 13.1% (3.2%–53.4%)     | 351      | 93.5               | 0        |
| Northeast                     | 9              | 390             | 69.3% (62.5%–76.8%)    | 261                   | 0                  | 0.41     | 23.3% (12.2%–44.2%)    | 105      | 83.4               | 0        |
| Total                         |                |                 |                        |                       |                    |          |                        |          |                    |          |
| China                         | 260            | 42301           | 71.4% (66.2%–77.0%)    | 27023                 | 94.2               | 0        | 22.9% (18.6%–28.2%)    | 14723    | 95.8               | 0        |

<sup>a</sup> *n*, number of isolates of *S. flexneri* or *S. sonnei*; In order to reduce the bias caused by uneven distribution of included studies, we firstly estimated prevalence of major causative species in each province. Estimation of geographic areas and mainland China was based on estimation of provinces. Two studies in Wuhan and one study in Chengdu was excluded in stratified analysis, as which could cause obvious bias on estimation of Hubei and Sichuan Province. No study in Sichuan and Hainan Province was included in stratified analysis.

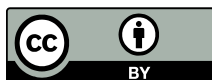

© 2016 by the authors; licensee MDPI, Basel, Switzerland. This article is an open access article distributed under the terms and conditions of the Creative Commons by Attribution (CC-BY) license (<http://creativecommons.org/licenses/by/4.0/>).
