# Supplementary material for: Patterns of Bacillary Dysentery in China, 2005–2010
Source: MDPI journal article supplement (doi:10.3390/ijerph13020164), 2016-01-27
Supplement: s2 [file s2]

## Sheet: Included Studies
First author	Study duration	Province	City/Autonomous prefecture/Prefecture/League	District/County	Study name	Province	Region	Total sample size	Shigella species				Article Title	Journal	Language
									S. flexneri	S. sonnei	S. dysenteriae	S. boydii
Ai Jing	2007-2011	Jiangsu			Jiangsu, 2007-2011, Ai Jing	Jiangsu	East	1038	741	297			Epidemic characteristics of infective diarrhea disease in Jiangsu Province from 2004 to 2011	Acta Universitatis Medicinalis Nanjing	Chinese
Bai Yu	2007	Ningxia	Guyuan		Ningxia, 2007, Bai Yu	Ningxia	NorthWest	89	68	21			Surveillance on Shigella serotypes distributon and drug resistance of 89 diarrhea patients	Journal of Ningxia Medical University	Chinese
Bao Guile	2005-2007	Jiangxi	Fuzhou	Dongxiang	Jiangxi, 2005-2007, Bao Guile	Jiangxi	Middle	112	100	12			Distribution and drug resistance of pathogenic bacteria of infectious diarrhea	Experimental and Laboratory Medicine	Chinese
Bu Liwei	2006-2007	Beijing	Beijing	Tongzhou	Beijing, 2006-2007, Bu Liwei	Beijing	North	20	14	6			An analysis on test and antibiotic resistance in strains of Shigella isolated in Tongzhou District in 2006~2007	Chinese Journal of Health Laboratory Technology	Chinese
Cao Zhong	2009-2011	Jiangsu	Nantong		Jiangsu, 2009-2011, Cao Zhong	Jiangsu	East	52	29	23			Pathogenic monitoring of Shigella in Nantong City, 1997-2011	Jiangsu Journal of Preventive Medicine	Chinese
Chang Keping	2005-2008	Henan	Xinxiang		Henan, 2005-2008, Chang Keping	Henan	Middle	57	49	8			An analysis on the pathogenic bacteria and the rate of drug sensitivity with acute bacterial dysentery and its clinical implications	Chinese Journal of Microecology	Chinese
Chen Aiping	2005-2010	Fujian			Fujian, 2005-2010, Chen Aiping	Fujian	East	104	40	64			Prevalence of virulence genes in isolates of Shigella species from Fujian. 2005-2010	Chinese Journal of Zoonoses	Chinese
Chen Chuanwei	2008-2012	Henan	Shangqiu	Yongcheng	Henan, 2008-2012, Chen Chuanwei	Henan	Middle	92	77	15			Epidemiological analysis of bacterial dysentery in young children and students in YongCheng from 2008 to 2012	Chinese Journal of School Doctor	Chinese
Chen Cong	2004-2009	Jiangsu	Changzhou		Jiangsu, 2004-2009, Chen Cong	Jiangsu	East	113	102	11			Epidemiological and etiological characteristics of bacillary dysentery in Changzhou City from 2004 to 2009	Acta Universitatis Medicinalis Nanjing	Chinese
Chen Jianying	2007	Jiangsu	Changzhou		Jiangsu, 2007, Chen Jianying	Jiangsu	East	38	29	7	1	1	Analysis of species and drug resistance of Shigella carried by food parcitioners in Changzhou	Occupation and Health	Chinese
Chen Weixin	2005	Shanghai	Jiading		Shanghai, 2005, Chen Weixin	Shanghai	East	121	93	28			Emergence of three new subserotypes of Shigella and their vicissitude in 11 years in Jiading District	Chinese Journal of Health Laboratory Technology	Chinese
Chen Weixin	2006	Shanghai	Jiading		Shanghai, 2006, Chen Weixin	Shanghai	East	52	38	14			Study on the disparity of Shigella serotypes distribution in Jiading, Shanghai	Journal of Modern Laboratory Medicine	Chinese
Chen Xiuhua	2007-2009	Shanghai	Minhang		Shanghai, 2007-2009, Chen Xiuhua	Shanghai	East	261	190	71			Serotype distribution and drug resistance of 261 Shigella strains	Occupation and Health	Chinese
Chen Yuhong	2006-2010	Jiangsu	Yancheng		Jiangsu, 2006-2010, Chen Yuhong	Jiangsu	East	63	48	14		1	Analysis on Shigella serotypes in Yancheng City, 2006-2010	Medical Journal of Communications	Chinese
Cheng Chunrong	2005	Henan	Zhengzhou		Henan, 2005, Cheng Chunrong	Henan	Middle	42	39	3			Detection and antibiotics resistance for Shigella from diarrhea cases in Zhengzhou City (2005)	Journal of Public Health and Preventive Medicine	Chinese
Cheng Chunrong	2005-2010	Henan	Zhengzhou		Henan, 2005-2010, Cheng Chunrong	Henan	Middle	183	145	38			Detection for Shigella from diarrhea cases in Zhengzhou City from 2005 to 2010	Henan Medical Research	Chinese
Cheng Junfu	2009-2011	Hubei			Hubei, 2009-2011, Cheng Junfu	Hubei	Middle	37	29	8			Analysis on the gene data of bacillary dysentery in Hubei Province	Journal of Public Health and Preventive Medicine	Chinese
Cheng Rong	2005-2009	Beijing	Beijing	Fengtai	Beijing, 2005-2009, Cheng Rong	Beijing	North	171	63	108			Monitoring of Shigella flexneri in Fengtai District of Beijing	Modern Preventive Medicine	Chinese
Cheng Tingting	2007-2011	Jiangsu	Nanjing		Jiangsu, 2007-2011, Cheng Tingting	Jiangsu	East	75	21	54			Etiology surveillance of bacillary dysentery in Nanjing, Jiangsu, 2007-2011	Disease Surveillance	Chinese
Cui Enbo	2005-2009	Beijing	Beijing		Beijing, 2005-2009, Cui Enbo	Beijing	North	413	193	195	9	16	Distribution and antimicrobial resistant tendency of Shigella spp. Group and serotype in diarrhea patients during 18 years	Chinese Journal of Nosocomiology	Chinese
Di Manxi	2006	Shanxi	Jinzhong	Jiexiu	Shanxi, 2006, Di Manxi	Shanxi	North	20	20				Investigation of bacillary dysentery speices and drug resistance in Fenxi mine area in 2006	Public Medical Forum Magazine	Chinese
Dolma Benba	2005	Tibet	Lasa	Linzhou	Tibet, 2005, Dolma Benba	Tibet	SouthWest	36	36				Detection of bacillary dysentery pathogens in Middle school of Linzhou County, Tibet	Chinese Journal of Health Laboratory Technology	Chinese
Dong Jianyuan	2005-2009	Anhui	Huaibei		Anhui, 2005-2009, Dong Jianyuan	Anhui	East	197	188	9			Analysis on bacterial dysentery monitoring and drug resistance in Huaibei City, 2005-2009	Chinese Journal of Disease Control and Prevention	Chinese
Dong Jie	2005-2007	Tianjin			Tianjin, 2005-2007, Dong Jie	Tianjin	North	62	36	26			Distribution of Shigella enterotoxins genes and PFGE molecular typing of Shigella strains in Tianjin	Journal of Environment and Health	Chinese
Dong Luming	2010	Xinjiang	Urumuqi		Xinjiang, 2010, Dong Luming	Xinjiang	NorthWest	47	38	3	4	2	Surveillance and analysis of antimicrobial resistance of bacterial pathogens isolated from patients with diarrhea in Urumqi in 2010	Infectious Disease Information	Chinese
Fang Jianwei	2008-2010	Shanghai	Baoshan		Shanghai, 2008-2010, Fang Jianwei	Shanghai	East	74	25	48	1		Analysis on distribution and drug resistance of 74 strains of Shigella	Heilongjiang Medicine and Pharmacy	Chinese
Fu Jingchun	2005	Jiangsu	Wuxi		Jiangsu, 2005, Fu Jingchun	Jiangsu	East	66	43	20	2	1	Serological study of Shigella strains isolated in Wuxi	Modern Preventive Medicine	Chinese
Fu Xiaohong	2008-2011	Zhejiang	Ningbo		Zhejiang, 2008-2011, Fu Xiaohong	Zhejiang	East	175	117	56	2		Genotyping and antibiotic resiatance of prevanlent food-borne pathogenic bacteria in Ningbo	Chinese Journal of Health Laboratory Technology	Chinese
Gao Chunyan	2008-2009	Hebei	Tangshan		Hebei, 2008-2009, Gao Chunyan	Hebei	North	14	11	2		1	Analysis of etiology and drug resistance of infectious diarrhea	Modern Preventive Medicine	Chinese
Gao Chunyan	2006	Hebei	Tangshan		Hebei, 2006, Gao Chunyan	Hebei	North	79	61	18			Analysis of Shigella serotpyes and drug resistance in children	Chinese Journal of Clinical Laboratory Science	Chinese
Gao Lu	2007-2009	Tianjin			Tianjin, 2007-2009, Gao Lu	Tianjin	North	96	53	42	1		Surveillance of bacillary dysentery in Tianjin from 2007 to 2009	Chinese Journal of Preventive Medicince	Chinese
Gao Qingshuang	2008-2010	Hebei	Tangshan		Hebei, 2008-2010, Gao Qingshuang	Hebei	North	26	17	8		1	Analysis of the distribution of 152 Shigella strains types and drug resistance in children	Maternal and Child Health Care of China	Chinese
Gao Tiansheng	2006-2008	Liaoning	Benxi		Liaoning, 2006-2008, Gao Tiansheng	Liaoning	NorthEast	51	37	10	3	1	Cultivetion of pathogenic bacteria from dysentery stools and monitoring of drug resistance in Benxi, 2006-2008	China Health Care and Nutrition	Chinese
Gao xia	2005-2008	Heilongjiang	Harbin		Heilongjiang, 2005-2008, Gao xia	Heilongjiang	NorthEast	36	20	13	2	1	Pathogenic detection of diarrhea in Harbin City, 2005-2008	Chinese Primary Health Care	Chinese
Ge Dafang	2005	Anhui	Maanshan		Anhui, 2005, Ge Dafang	Anhui	East	67	48	19			Surveillance on bacterial dysentery in the city of Maanshan and analysis on its drug resistance	Disease Surveillance	Chinese
Ge Hua	2007	Qinghai			Qinghai, 2007, Ge Hua	Qinghai	NorthWest	63	54	9			Analysis on serotypes distribution and drug resistance of 63 strains of Shigella	Qinghai Medical Journal	Chinese
Guan Hongxia	2010	Jiangsu	Wuxi		Jiangsu, 2010, Guan Hongxia	Jiangsu	East	17	5	12			Analysis on sertype distribution and antibiotic resistance of Shigella in Wuxi from 2010 to 2011	Chinese Journal of Health Laboratory Technology	Chinese
Guo Yuanyu	2006-2010	Zhejiang	Hangzhou	Xiaoshan	Zhejiang, 2006-2010, Guo Yuanyu	Zhejiang	East	250	73	176		1	Serotype distribution and drug resistance Shigella isolated from diarrhea children in Xiaoshan, Zhejiang, 2006-2011	Disease Surveillance	Chinese
Guo Yuanyu	2008-2012	Zhejiang	Hangzhou	Xiaoshan	Zhejiang, 2008-2012, Guo Yuanyu	Zhejiang	East	124	58	66			Analysis of serotype and drug resistance of Shigella from diarrhea adults	Chinese Journal of Microecology	Chinese
Gupur Shahidan	2006	Xinjiang			Xinjiang, 2006, Gupur Shahidan	Xinjiang	NorthWest	231	206	18	7		Pathogenic and drug resistance analysis on bacillary dysentery in Xinjinag, 2006	Bulletin of Disease Control and Prevention	Chinese
Han Ming	2005-2011	Shandong	Taian	Xintai	Shandong, 2005-2011, Han Ming	Shandong	East	243	153	67	23		Analysis on epidemic characteristics of bacillary dysentery in Xintai from 2005 to 2011	Preventive Medicine Tribune	Chinese
Hao Ruie	2005-2006	Shanxi			Shanxi, 2005-2006, Hao Ruie	Shanxi	North	90	80	10			Distribution of shigella serotypes and drug resistance in Shanxi Province	Shanxi Medical Journal	Chinese
He Yong	2005	Tibet	Shanan	Zhanang	Tibet, 2005, He Yong	Tibet	SouthWest	14	14				A population based investigation on bacillary dysentery in Zhanang County, Tibet 2005	Chinese Journal of Preventive Medicince	Chinese
Hei Meifang	2006	Jiangsu	Changzhou		Jiangsu, 2006, Hei Meifang	Jiangsu	East	115	97	15	2	1	Analysis of distribtuion and drug resistance of Salmonella and Shigella in Changzhou City	Occupation and Health	Chinese
Hou Fengqin	2006	Beijing	Beijing		Beijing, 2006, Hou Fengqin	Beijing	North	26	15	11			Infectious diarrhea bacterial pathogens monitoring and resistance to antibiotics in Beijing	Chinese Journal of Clinical Pharmacology	Chinese
Hou Wei	2008	Zhejiang	Taizhou		Zhejiang, 2008, Hou Wei	Zhejiang	East	50	48	1	1		Analysis on distribution of Shigella serotypes and drug resistance in Taizhou	The 21st National Academic Conffernece Integrative Medicine on Digestive System Diseases	Chinese
Hu Jiang	2005-2006	Anhui	Maanshan		Anhui, 2005-2006, Hu Jiang	Anhui	East	66	41	25			Distribution of drug resistance of pathogenic bacteria in 171 cases of bacterial diarrhea	Journal of Bengbu Medical College	Chinese
Hu Jianli	2005-2010	Jiangsu			Jiangsu, 2005-2010, Hu Jianli	Jiangsu	East	1386	1049	337			Analysis on epidemic characteristics of bacillary dysentery in Jiangsu Province from 2004 to 2010	Chinese Journal of Preventive Medicince	Chinese
Hu Lifen	2005	Anhui	Hefei		Anhui, 2005, Hu Lifen	Anhui	East	91	57	31		3	Distribution and Resistance to Antibiotics of Shigella in Anhui Province	Chinese Journal of Nosocomiology	Chinese
Hu Quan	2006-2007	Hubei	Wuhan		Hubei, 2006-2007, Hu Quan	Hubei	Middle	19	2	17			Monitoring and analysis on durg resistance of bacillary dysentery in Wuhan, 2006-2007	Journal of Public Health and Preventive Medicine	Chinese
Hu Shoukui	2007-2008	Anhui			Anhui, 2007-2008, Hu Shoukui	Anhui	East	22	19	2		1	Bacteria-type distribution and molecular typing of bacillary dysentery epidemic strains by pulsed-field in Anhui Province in 2007~2008	Anhui Journal of Preventive Medicine	Chinese
Huang Jinlian	2004-2006	Zhejiang	Jinhua	Yongkang	Zhejiang, 2004-2006, Huang Jinlian	Zhejiang	East	62	54	8			Epidemiological and etiological drug resiatance of 487 cases of bacillary dysentery	Disease Surveillance	Chinese
Huang Jinlian	2004-2007	Zhejiang	Jinhua	Yongkang	Zhejiang, 2004-2007, Huang Jinlian	Zhejiang	East	72	63	9			Analysis of serotype distribution and drug resistance of 72 strains of Shigella	The Journal of Practical Medicine	Chinese
Huang Weizhi	2005-2007	Jiangxi	Yichun		Jiangxi, 2005-2007, Huang Weizhi	Jiangxi	Middle	165	88	40	16	21	Analysis of serotype and drug resistance of pathogenic bacterium in bacillary dysentery	International Journal of Laboratory Medicine	Chinese
Ji Jinling	2005-2010	Beijing	Beijing		Beijing, 2005-2010, Ji Jinling	Beijing	North	318	143	169	3	3	Analysis of 1004 strains of pathogenic bacteria of children diarrhea and drug resistance test	Chinese Journal of Clinicians	Chinese
Jiang Hongchao	2008-2010	Yunnan	Kunming		Yunnan, 2008-2010, Jiang Hongchao	Yunnan	SouthWest	96	75	19	2		Analysis of distributon and antibiotic resistance of 147 strains of shigella in children with bacillary dysentery	Journal of Pediatric Pharmacy	Chinese
Jiang Huifeng	2005	Shanghai	Baoshan		Shanghai, 2005, Jiang Huifeng	Shanghai	East	504	345	159			Epidemic analysis of bacillary dysentery in Baoshan District, Shanghai, 2005	Shanghai Journal of Preventive Medicine	Chinese
Jiang Songqiang	2005-2007	Henan	Zhengzhou		Henan, 2005-2007, Jiang Songqiang	Henan	Middle	116	97	19			Analysis of monitoring results for Shigella for diarrhea cases in Zhengzhou City from 2005 to 207	Preventive Medicine Tribune	Chinese
Jiang Songqiang	2005-2008	Henan	Zhengzhou		Henan, 2005-2008, Jiang Songqiang	Henan	Middle	146	121	25			Epidemiologic features of bacillary dysentery during 1990-2009 in Zhengzhou City	A Thesis Submitted to Zhengzhou University for the Degree of Master	Chinese
Jiang Ying	2009-2010	Xinjiang	Urumuqi		Xinjiang, 2009-2010, Jiang Ying	Xinjiang	NorthWest	14	8	4	1	1	Clinical features, etiology distribution and drug resistance in patients with infectious diarrhea	Beijing Medical Journal	Chinese
Jin Guonong	2008-2009	Zhejiang	Hangzhou	Xihu	Zhejiang, 2008-2009, Jin Guonong	Zhejiang	East	34	12	19	3		Analysis on distribution of Shigella species and drug resisatance of diarrhea patients in Xihu District, Hangzhou	Zhejiang Preventive Medicine	Chinese
Kang Qian	2006-2009	Gansu			Gansu, 2006-2009, Kang Qian	Gansu	NorthWest	473	290	181	2		Antibiotic resistance testing and PFGE typing analysis of Shigella strains isolated from Gansu Province (2006-2009)	Journal of Public Health and Preventive Medicine	Chinese
Kang Yanming	2006-2010	Yunnan	Nujiang		Yunnan, 2006-2010, Kang Yanming	Yunnan	SouthWest	150	150				Analysis on change of serotypes and drug resistance of Shigella in Nujiang Autonomous Prefecture from 2006 to 2010	Medical Laboratory Science	Chinese
Lan Quanxue	2005-2006	Guangdong	Shenzhen		Guangdong, 2005-2006, Lan Quanxue	Guangdong	South	19	12	6		1	Analysis of pulsed-field gel electrophoresis molecular subtyping of Shigella strains in Shenzhen	Chinese Journal of Preventive Medicine	Chinese
Li Changjun	2005-2007	Shaanxi	Baoji		Shaanxi, 2005-2007, Li Changjun	Shaanxi	NorthWest	139	73	64		2	Distribution of Shigella serotypes and drug resistance	Journal of Aerospace Medicine	Chinese
Li Daikun	2006-2008	Guangdong	Guangzhou		Guangdong, 2006-2008, Li Daikun	Guangdong	South	153	124	29			Pathogenic bacteria of infantile diarrhea and their drug resistance	International Journal of Laboratory Medicine	Chinese
Li Guangting	2005-2006	Guangdong	Zhanjiang		Guangdong, 2005-2006, Li Guangting	Guangdong	South	40	36	2	2		Research of hospital infectious diarrhea flora and changes of drug resistance	Jilin Medical Journal	Chinese
Li Haidan	2005-2008	Fujian	Longyan	Xinluo	Fujian, 2005-2008, Li Haidan, 1	Fujian	East	28	9	19			Analysis of pathogenic surveillance of bacillary dysentery in Fujian Province from 2005 to 2008	Strait Journal of Preventive Medicine	Chinese
			Zhangzhou	XiangCheng	Fujian, 2005-2008, Li Haidan, 2	Fujian	East	49	19	30
Li Haidan	2006-2007	Fujian	Zhangzhou	XiangCheng	Fujian, 2006-2007, Li Haidan, 1	Fujian	East	19	12	7			Analysis of Shigella spp. surveillance in Fujian Province from 2006 to 2007	Chinese Journal of Health Laboratory Technology	Chinese
			Longyan	Xinluo	Fujian, 2006-2007, Li Haidan, 2	Fujian	East	22	5	17
Li Haidan	2005-2009	Fujian	Zhangzhou	XiangCheng	Fujian, 2005-2009, Li Haidan, 1	Fujian	East	64	24	40			Analysis of Shigella spp. surveillance in Fujian Province from 2005 to 2009	Chinese Journal of Health Laboratory Technology	Chinese
			Longyan	Xinluo	Fujian, 2005-2009, Li Haidan, 2	Fujian	East	33	12	21
Li Jiyao	2005-2009	Liaoning	Shenyang		Liaoning, 2005-2009, Li Jiyao	Liaoning	NorthEast	62	29	33			Change in strain types and drug-susceptibility of Shigella from 2004 to 2009 in Shenyang	Chinese Journal of Health Laboratory Technology	Chinese
Li Li	2005-2008	Inner Mongolia	Baotou		Inner Mongolia, 2005-2008, Li Li	Inner Mongolia	North	96	78	18			Analysis on serotypes distribution and drug resistance of 95 strains of Shigella	Journal of Baotou Medical College	Chinese
Li Menglei	2010	Henan	Shangqiu	Suixian	Henan, 2010, Li Menglei	Henan	Middle	34	19	15			Investigation and analysis on diarrhea and bacillary dysentery incidence in rural areas, Henan	Modern Preventive Medicine	Chinese
Li Min	2008-2010	Beijing	Beijing	Shijingshan	Beijing, 2008-2010, Li Min	Beijing	North	50	22	26	2		Epidemiological analysis for bacillary dysentery in Shijingshan District of Beijing during 2004~2010	Capital Journal of Public Health	Chinese
Li Peiyong	2007-2011	Xinjiang	Changji	Manas	Xinjiang, 2007-2011, Li Peiyong	Xinjiang	NorthWest	153	122	31			Analysis of distribution and drug resistance of pediatric bacterial diarrhea pathogens in Manas County from 2007 to 2011	Chinese Journal of Health Laboratory Technology	Chinese
Li Ping	2005-2006	Shandong	Jinan	Huaiyin	Shandong, 2005-2006, Li Ping	Shandong	East	100	94	6			Analysis on serotypes distribution and drug resistance of 284 strains of Shigella	Shandong Medical Journal	Chinese
Li Shaogang	2006	Beijing	Beijing	XiCheng	Beijing, 2006, Li Shaogang	Beijing	North	168	59	107		2	Distribution of 168 Shigella Strains and results of drug sensitivity test	China Tropical Medicine	Chinese
Li Wei	2005	Beijing	Beijing	XiCheng	Beijing, 2005, Li Wei	Beijing	North	70	37	33			Serotyping and susceptibility test of 70 Shigella spp. strains	Chinese Journal of Nosocomiology	Chinese
Li Wenlang	2006-2007	Guangdong	Shenzhen		Guangdong, 2006-2007, Li Wenlang	Guangdong	South	204	141	63			1091 Cases of Bacterial Diarrhea Pathogen Distribution and Antibiotic Resistance Analysis	Chinese Journal of Medicinal Guide	Chinese
Li Xiaoyu	2008-2010	Zhejiang	Hangzhou		Zhejiang, 2008-2010, Li Xiaoyu	Zhejiang	East	76	46	27	0	3	Salmonella and Shigella caused infectious diarrhea in children and pathogens drug resistance in Hangzhou	Disease Surveillance	Chinese
Li Xiaoyun	2007-2010	Gansu	Lanzhou		Gansu, 2007-2010, Li Xiaoyun	Gansu	NorthWest	36	28	8			Distribution and antibiotic resistance in 739 cases of infectious diarrhea pathogen	Medical Journal of National Defending Forces in Northwest China	Chinese
Li Yi	2005-2008	Shanghai	Jing'an		Shanghai, 2005-2008, Li Yi	Shanghai	East	139	67	72			Analysis on serotype and antibiotics resistance of Shigella isolated in Jing'an District of Shanghai from 2005-2008	Modern Preventive Medicine	Chinese
Liang Wenge	2005-2006	Shaanxi	Baoji		Shaanxi, 2005-2006, Liang Wenge	Shaanxi	NorthWest	304	232	25	41	6	Analysis of distribution and change of Shigella bacteria in Baoji from 1997 to 2006	Practical Preventive Medicine	Chinese
Liu Chongcheng	2009	Beijing	Beijing	Changping	Beijing, 2009, Liu Chongcheng	Beijing	North	38	16	22			Surveillance of shigellosis in Changping district of Beijing 2009	Disease Surveillance	Chinese
Liu Guirong	2010	Beijing	Beijing		Beijing, 2010, Liu Guirong	Beijing	North	195	33	162			Etiological analysis of bacillary dysentery in Beijing 2010	Chinese Journal of Preventive Medicine	Chinese
Liu Haixia	2005-2009	Gansu			Gansu, 2005-2009, Liu Haixia	Gansu	NorthWest	571	339	230	2		Analysis on bacillary dysentery surverillance in Gansu Province from 2005 to 2009	Chinese Journal of Health Laboratory Technology	Chinese
Liu Jing	2008-2010	Beijing	Beijing	XiCheng	Beijing, 2008-2010, Liu Jing	Beijing	North	85	25	59		1	Analysis on Change of serum types and drug resistance of Shigella in Xicheng District of Beijing from 2008 to 2010	Occupation and Health	Chinese
Liu Liming	2005-2006	Beijing	Beijing		Beijing, 2005-2006, Liu Liming	Beijing	North	282	149	120	2	11	Distribution and resistance of enteric pathogenic bacteria in Beijing area from 2005 to 2006	Chinese Journal of Antibiotics	Chinese
Liu Qiang	2004-2006	Xinjiang	Bayinguoleng	Bohu	Xinjiang, 2004-2006, Liu Qiang	Xinjiang	NorthWest	52	33	10	7	2	Distribution of Shigella serotypes and drug resistance analysis in Bohu County, 2000-2006	Occupation and Health	Chinese
Liu Shuping	2006-2010	Hebei	Tangshan		Hebei, 2006-2010, Liu Shuping	Hebei	North	152	122	28	1	1	Distribution of Shigella strains types and drug resistance in children	Maternal and Child Health Care of China	Chinese
Liu Yan	2006	Shanxi	Taiyuan		Shanxi, 2006, Liu Yan	Shanxi	North	40	33	7			Serotype and drug resistance of isolated Shigella strains in Taiyuan in 2006	Disease Surveillance	Chinese
Liu Yingchun	2007	Beijing	Beijing	Chaoyang	Beijing, 2007, Liu Yingchun	Beijing	North	192	29	163			Analysis on the serotyes and antimicrobial-susceptibility of Shigella and Salmonella spp. Isolates	Journal of China-Japan Friendship Hosptial	Chinese
Liu Yun	2005-2007	Shandong	Jinan	Huaiyin	Shandong, 2005-2007, Liu Yun	Shandong	East	146	116	26	4		Analysis of types and antibiotic susceptibility of 246 diarrhea genic Shigella	Chinese Journal of Health Laboratory Technology	Chinese
Lu Xiaomei	2007-2009	Shanxi	Datong		Shanxi, 2007-2009, Lu Xiaomei	Shanxi	North	157	115	42			Analysis on distribution and drug resistance of 237 strains of diarrhea pathogenic bacterium	Laboratory Medicine and Clinic	Chinese
Luo Chaochen	2005-2006	Fujian	Zhangzhou	XiangCheng	Fujian, 2005-2006, Luo Chaochen, 1	Fujian	East	27	8	19			Epidemiological analysis on bacillary dysentery in Fujian Province, 2000-2006	Chinese Journal of Preventive Medicine	Chinese
		Fujian	Longyan	Xinluo	Fujian, 2005-2006, Luo Chaochen, 2	Fujian	East	22	7	15
Luo Lingfei	2005-2009	Shanghai	Minhang		Shanghai, 2005-2009, Luo Lingfei	Shanghai	East	693	424	269			Distribution and vicissitude of Shigella in Minhang District of Shanghai City from 2003-2009	Occupation and Health	Chinese
Luo Lingfei	2007	Shanghai	Minhang		Shanghai, 2007, Luo Lingfei	Shanghai	East	132	99	33			Analysis on distribution and drug resistance of Shigella in Minhang District of Shanghai	Practical Preventive Medicine	Chinese
Luo Lingfei	2007-2009	Shanghai	Minhang		Shanghai, 2007-2009, Luo Lingfei	Shanghai	East	251	180	71			Analysis of distribution of serotypes and antibiotic resistance of Shigella species in Minhang District of Shanghai, 2007-2009	Journal of Environmental and Occupational Medicine	Chinese
Luo Lingfei	2005-2006	Shanghai	Minhang		Shanghai, 2005-2006, Luo Lingfei	Shanghai	East	427	228	199			Analysis of the distribution and vicissitude of Shigella in Minhang District of Shanghai from 2003 to 2006	Modern Preventive Medicine	Chinese
Luo Xuehui	2007-2011	Zhejiang	Ningbo	Yuyao	Zhejiang, 2007-2011, Luo Xuehui	Zhejiang	East	36	30	6			Surveillance of Shigella in Yuyao, Zhejiang, 2007-2011	Disease Surveillance	Chinese
Ma Qing	2005-2009	Guizhou			Guizhou, 2005-2009, Ma Qing	Guizhou	SouthWest	156	85	71			Analysis of Shigella distribution and drug resistance in Guizhou from 2005 to 2009	Chinese Journal of Pest Control	Chinese
Ma Shiquan	2005-2009	Jilin	Tonghua		Jilin, 2005-2009, Ma Shiquan	Jilin	NorthEast	48	26	5	4	13	Analysis of distribution, biochemical characteristics and drug resistance of Shigella spp. in Tonghua, 1985-2009	Chinese Journal of Ethnomedicine and Ethnopharmacy	Chinese
Mao Jianying	2005-2010	Shanghai	Baoshan		Shanghai, 2005-2010, Mao Jianying	Shanghai	East	1321	700	621			Analysis on the changes of Shigella species and drug resistance in Baoshan District, Shanghai, 1990-2011	Shanghai Journal of Preventive Medicine	Chinese
Mao Jianying	2009	Shanghai	Baoshan		Shanghai, 2009, Mao Jianying	Shanghai	East	88	59	29			Analysis on detection results of bacillary dysentery in national surveillance site in Baoshan District of Shanghai in 2009	Occupation and Health	Chinese
Mao Yuanli	2005-2010	Beijing	Beijing		Beijing, 2005-2010, Mao Yuanli	Beijing	North	406	169	237			Changing trends and serotype distribution of Shigella species in Beijing from 1994 to 2010	Gut Pathogens	English
Miao Yuan	2010	Beijing	Beijing	XiCheng	Beijing, 2010, Miao Yuan	Beijing	North	9	1	8			Monitoring results of intestinal pathogens in Xicheng District of Beijing City in 2010	Occupation and Health	Chinese
Muhe Yati	2007	Xinjiang			Xinjiang, 2007, Muhe Yati	Xinjiang	NorthWest	336	310	21	5		Surveillance of bacterial intestinal infectious disease in Xinjiang, 2007	Disease Surveillance	Chinese
Niu Huancai	2006-2008	Beijing	Beijing	Changping	Beijing, 2006-2008, Niu Huancai	Beijing	North	79	29	47	2	1	Analysis on etiological monitoring results of bacillary dysentery in Changping from 2006 to 2008	Chinese Journal of Health Laboratory Technology	Chinese
Pang Jingjing	2010	Beijing	Beijing		Beijing, 2010, Pang Jingjing	Beijing	North	69	14	55			Analysis of distribution and drug resistance of pathogenic bacteria from 359 diarrhea patients in Beijing	Chinese Journal of Health Laboratory Technology	Chinese
Qian Huimin	2008-2009	Jiangsu			Jiangsu, 2008-2009, Qian Huimin	Jiangsu	East	498	344	150		4	Analysis on the serotype and antimicrobial resistance of Shigella spp. During 2008~2009 in Jiangsu Province	Jiangsu Journal of Preventive Medicine	Chinese
Qin Enqiang	2005	Beijing	Beijing		Beijing, 2005, Qin Enqiang	Beijing	North	116	68	48			Analysis of the group distribution and drug sensitivity in 116 patients with shigellosis	Beijing Medical Journal	Chinese
Qiu Yaqun	2005	Guangdong	Shenzhen		Guangdong, 2005, Qiu Yaqun	Guangdong	South	33	32	1			Analysis of distribution of serotype and drug resistance of Shigella in Shenzhen	China Tropical Medicine	Chinese
Qu Mei	2004-2011	Beijing	Beijing		Beijing, 2004-2011, Qu Mei	Beijing	North	1652	943	699	7	3	An eight-year study of Shigella species in Beijing, China: serodiversity, virulence genes, and antimicrobial resistance	Journal of Infection in Developing Countries	English
Qu Mei	2005-2010	Beijing	Beijing		Beijing, 2005-2010, Qu Mei	Beijing	North	1305	589	708	4	4	Distribution of different serotypes and analysis of virulence genes in Shigella species in Beijing from 2004 to 2010	Chinese Journal of Health Laboratory Technology	Chinese
Ren Shumin	2005-2010	Beijing	Beijing	Yanqing	Beijing, 2005-2010, Ren Shumin	Beijing	North	44	21	17	1	5	Distribution and resistance trends of dysentery flora in Yanqing County of Beijing City from 1999-2011	Occupation and Health	Chinese
Ren Shumin	2009-2010	Beijing	Beijing	Yanqing	Beijing, 2009-2010, Ren Shumin	Beijing	North	28	10	16	1	1	Distribution and drug resistance of Shigella in Yanqing County from 2009 to 2010	Chinese Journal of Public Health Management	Chinese
Ru Weiping	2005-2009	Henan			Henan, 2005-2009, Ru Weiping	Henan	Middle	1487	1278	209			Analysis on the epidemic and aetiological character of bacillary dysentery in Henan Province from 2005 to 2009	Modern Preventive Medicine	Chinese
Shao Liye	2007	Henan	Shangqiu		Henan, 2007, Shao Liye	Henan	Middle	6	3	2	1		Analysis of surverying results of infectious diarrhea pathogens detected in individual clinics in summer and autumn in Shangqiu 2007	Chinese Journal of Health Laboratory Technology	Chinese
Shen Lizhen	2006-2008	Zhejiang	Wenzhou		Zhejiang, 2006-2008, Shen Lizhen	Zhejiang	East	116	80	28	7	1	Serotyping and drug resistance of Shigella circulated in Wenzhou, Zhejiang Province	Disease Surveillance	Chinese
Shen Yuehua	2008-2010	Zhejiang	Huzhou		Zhejiang, 2008-2010, Shen Yuehua	Zhejiang	East	33	23	10			Analysis on distribution of Shigella serotypes and drug resistance	Shanghai Journal of Preventive Medicine	Chinese
Shen Yun	2008-2010	Jiangsu			Jiangsu, 2008-2010, Shen Yun	Jiangsu	East	716	491	214	4	7	High Prevalence of Antibiotic Resistance and Molecular Characterization of Integrons among Shigella Isolates in Eastern China	Antimicrobial Agents and Chemotherapy	Chinese
Shi Miaosheng	2005-2007	Shanghai			Shanghai, 2005-2007, Shi Miaosheng	Shanghai	East	120	58	62			Distribution of Shigella serotypes and drug resistance analysis	Journal of Clinical and Experimental Medicine	Chinese
Shi Wenping	2005-2009	Shanghai	Minhang		Shanghai, 2005-2009, Shi Wenping	Shanghai	East	55	36	19			Epidemiological analysis on bacillary dysentery during 2005 to 2009, in Minhang District, Shanghai	Shanghai Journal of Preventive Medicine	Chinese
Song Yuehong	2006	Henan	Anyang		Henan, 2006, Song Yuehong	Henan	Middle	70	55	15			Fascicular distribution of Shigella isolates among diarrhea patients in Anyang City in 2006	Occupation and Health	Chinese
Su Dongxia	2005-2006	Beijing	Beijing	Yanqing	Beijing, 2005-2006, Su Dongxia	Beijing	North	13	9			4	Distribution and changes of Shigella species from 1999 to 2006 in Yanqing County	Chinese Journal of Public Health Management	Chinese
Sui Jilin	2009	Anhui			Anhui, 2009, Sui Jilin	Anhui	East	25	21	4			Surveillance of bacillary dysentery in China, 2009	Disease Surveillance	Chinese
		Beijing			Beijing, 2009, Sui Jilin	Beijing	North	47	13	34
		Fujian			Fujian, 2009, Sui Jilin	Fujian	East	20	8	12
		Gansu			Gansu, 2009, Sui Jilin	Gansu	NorthWest	205	139	66
		Guizhou			Guizhou, 2009, Sui Jilin	Guizhou	SouthWest	50	5	45
		Henan			Henan, 2009, Sui Jilin	Henan	Middle	183	159	24
		Heilongjiang			Heilongjiang, 2009, Sui Jilin	Heilongjiang	NorthEast	6	6
		Qinghai			Qinghai, 2009, Sui Jilin	Qinghai	NorthWest	11	9	2
		Shanxi			Shanxi, 2009, Sui Jilin	Shanxi	North	35	29	6
		Shanghai			Shanghai, 2009, Sui Jilin	Shanghai	East	96	67	29
Sun Benhai	2010	Shandong	Binzhou		Shandong, 2010, Sun Benhai	Shandong	East	317	223	77	17		Cultivetion of pathogenic bacteria from 1354 diarrhea stools and monitoring of drug resistance	National Medical Frontiers of China	Chinese
Sun Huijun	2010	Henan	Xuchang	Changge	Henan, 2010, Sun Huijun	Henan	Middle	40		40			Surveillance of bacillary dysentery in Changge 2010	Henan Journal of Preventive Medicine	Chinese
Sun Peiyuan	2008	Beijing	Beijing	Haidian	Beijing, 2008, Sun Peiyuan	Beijing	North	16	9	7			Analysis of epidemic characteristics of clinical and laboratory diagnosed for bacillary dysentery cases in Haidian District in 2006	Modern Preventive Medicine	Chinese
Sun Peiyuan	2007	Beijing	Beijing	Haidian	Beijing, 2007, Sun Peiyuan, 1	Beijing	North	35	7	28			Epidemiological investigation and analysis of bacillary dysentery in Haidian District in 2007	Occupation and Health	Chinese
Sun Peiyuan	2007	Beijing	Beijing	Haidian	Beijing, 2007, Sun Peiyuan, 2	Beijing	North	13	2	11			Comprehensive analysis on clinical symptoms of bacillary dysentery by laboratory confirmation and clinical diagnosis in Haidian District in 2007	Modern Preventive Medicine	Chinese
Suresh Mehata	2006	Henan			Henan, 2006, Suresh Mehata, 1	Henan	Middle	103	90	13			Antimicrobial susceptibility and mechanism of resistance in Shigella isolates from rural China	Analysis of Microbiology	English
Suresh Mehata	2006	Henan			Henan, 2006, Suresh Mehata, 2	Henan	Middle	100	88	12			Molecular mechanism of multi-drug resistance in Shigella isolates from rural China.	Nepal Medical College Journal	English
Tang Guorong	2005-2009	Jiangsu	Wuxi		Jiangsu, 2005-2009, Tang Guorong	Jiangsu	East	358	210	148			Distribution and drug resistance of Shigella infections in children	Jiangsu Medical Journal	Chinese
Tang Yuxiang	2009-2010	Tianjin			Tianjin, 2009-2010, Tang Yuxiang	Tianjin	North	12	4	8			Surveillance of bacillary dysentey in Hangu District of Tianjin from 2009 to 2010	Henan Journal of Preventive Medicine	Chinese
Tao Yunzhen	2005-2006	Jiangsu	Suzhou		Jiangsu, 2005-2006, Tao Yunzhen	Jiangsu	East	153	109	44			The resistance monitoring inspection on Shigella with which children infected in Suzhou	Chinese Journal of Microecology	Chinese
Tian Geng	2007	Beijing	Beijing		Beijing, 2007, Tian Geng	Beijing	North	112	23	89			Clinical characteristics, drug resistance and etiology in 289 patients with acute infectious diarrhea	World Chinese Journal of Digestology	Chinese
Wang Chuanqing	2007	Shanghai	Minhang		Shanghai, 2007, Wang Chuanqing	Shanghai	East	91	58	33			Characteristics of bacterial pathogens associated with community-acquired pediatric diarrhea in Shanghai in 2007	Journal of Microbes and Infection	Chinese
Wang Chunjuan	2007	Shaanxi	Xi'an		Shaanxi, 2007, Wang Chunjuan	Shaanxi	NorthWest	6	4	2			Analysis of monitroing results of bacterial diarrhea in Xi'an City in 2007	Occupation and Health	Chinese
Wang Chunjuan	2008-2010	Shaanxi	Xi'an		Shaanxi, 2008-2010, Wang Chunjuan	Shaanxi	NorthWest	61	31	17	8	5	Analysis of the surveillance results of bacterial diarrhea in Xi'an from 2008 to 2012	Modern Preventive Medicine	Chinese
Wang Dali	2006-2008	Jiangsu	Yancheng	Binhai	Jiangsu, 2006-2008, Wang Dali	Jiangsu	East	57	44	10	2	1	Analysis on the infections and drug resistace of Shigella in food parctitioners in Binhai County, 2006-2008	Strait Journal of Preventive Medicine	Chinese
Wang Fang	2010	Hubei	Wuhan		Hubei, 2010, Wang Fang	Hubei	Middle	15	3	12			Analysis of Shigella strains isolated from Wuhan (2010)	Journal of Public Health and Preventive Medicine	Chinese
Wang Huiping	2006-2008	Shanghai	Baoshan		Shanghai, 2006-2008, Wang Huiping	Shanghai	East	64	48	16			Clinical and drug resistance of 94 cases of pediatric bacillary dysentery	Medical Information	Chinese
Wang Jianlan	2006-2008	Zhejiang	Haining		Zhejiang, 2006-2008, Wang Jianlan	Zhejiang	East	115	76	38	1		Analysis of testing results of 178 Shigella and Salmonella in Haining	Chinese Journal of Health Laboratory Technology	Chinese
Wang Jiuping	2004-2008	Shaanxi	Xi'an		Shaanxi, 2004-2008, Wang Jiuping	Shaanxi	NorthWest	136	125	3	8		Bacterial culture on stools in 496 patients with diarrhea and antimicrobial resistance	Chinese Journal of Infection Control	Chinese
Wang Lan	2006	Zhejiang	Hangzhou	Xiaoshan	Zhejiang, 2006, Wang Lan	Zhejiang	East	59	23	33	2	1	Distribution and drug resistance of Shigella in Xiaoshan hospital in 2006	Chinese Primary Health Care	Chinese
Wang Li	2009	Xinjiang			Xinjiang, 2009, Wang Li	Xinjiang	NorthWest	332	331	1			Pathogenic and drug resistance analysis on bacillary dysentery in Xinjinag, 2009	Xinjiang Medical Journal	Chinese
Wang Liheng	2006-2010	Shandong	Jinan		Shandong, 2006-2010, Wang Liheng	Shandong	East	483	365	108	6	4	Analysis on groups and serotypes of Shigella in Jinan, Shandong, 2006-2011	Disease Surveillance	Chinese
Wang Ping	2005-2008	Shanghai	Minhang		Shanghai, 2005-2008, Wang Ping	Shanghai	East	627	452	175			Serotyping of 952 Shigella strains and its resistance analysis in Minghang District of Shanghai City	Occupation and Health	Chinese
Wang Qiliang	2008-2012	Anhui	Huaibei	Suixi	Anhui, 2008-2012, Wang Qiliang	Anhui	East	300	290	9	1		Characteristics and attribtuoin of dysentery bacillus species and seropypes and analysis of its drug resistance	Journal of Huaihai Medicine	Chinese
Wang Xiaojuan	2005-2008	Shandong	Weifang		Shandong, 2005-2008, Wang Xiaojuan	Shandong	East	160	145	12		3	Analysis on drug susceptibility of 160 strains Shigella	Chinese Journal of Experimental and Clinial Infectious Diseases	Chinese
Wang Xiaoni	2009	Tianjin			Tianjin, 2009, Wang Xiaoni	Tianjin	North	61	27	33		1	Antimicrobial resistance in Shigella spp. and based on ERIC typing character crossing two decades in Tianjin	Clinical Focus	Chinese
Wang Yong	2005	Beijing	Beijing	Daxing	Beijing, 2005, Wang Yong	Beijing	North	47	34	13			Distribution and drug resistance of intestinal pathogenic bacteria in some areas of Beijing	Journal of Preventive Medicine of Chinese People's Liberation Army	Chinese
Wang Zongxin	2005-2006	Zhejiang	Shaoxing		Zhejiang, 2005-2006, Wang Zongxin	Zhejiang	East	82	54	25	1	2	Analysis on distribution of Shigella serotypes and drug resistance in Shaoxing, 2005-2006	Experimental and Laboratory Medicine	Chinese
Wei Xiaoyu	2007-2010	Guizhou			Guizhou, 2007-2010, Wei Xiaoyu	Guizhou	SouthWest	146	44	102			Epidemic characteristics and etiological analysis of bacillary dysentery in Guizhou Province during the period of 2007-2010	Practical Preventive Medicine	Chinese
Wu Xiaona	2005-2009	Beijing	Beijing		Beijing, 2005-2009, Wu Xiaona	Beijing	North	1001	530	466	3	2	Analysis of the epidemiological characteristics of dysentery-like cases from 2004 to 2009 in Beijing	Chinese Journal of Disease Control and Prevention	Chinese
Wu Xuebing	2008	Shanghai	Songjiang		Shanghai, 2008, Wu Xuebing	Shanghai	East	33	4	29			Results of monitoring on diarrhea caused by Shigella species	Practical Preventive Medicine	Chinese
Wu Zhongliao	2005	Shaanxi	Yulin		Shaanxi, 2005, Wu Zhongliao	Shaanxi	NorthWest	418	418				Analysis on bacterial drugs resistance in 5 hospitals of Yulin City during 2005	Evaluation and Analysis of Drug-Use in Hospitals of China	Chinese
Xia Shengli	2006	Henan	Anyang		Henan, 2006, Xia Shengli, 1	Henan	Middle	65	51	14			Prevalence and Characterization of Human Shigella Infections in Henan Province, China, in 2006	Journal of Clinical Microbiology	English
		Henan	Shangqiu		Henan, 2006, Xia Shengli, 2	Henan	Middle	29	25	4
		Henan	Shangqiu	Suixian	Henan, 2006, Xia Shengli, 3	Henan	Middle	202	147	55
		Henan	Zhengzhou		Henan, 2006, Xia Shengli, 4	Henan	Middle	48	37	11
		Henan	Jiyuan		Henan, 2006, Xia Shengli, 5	Henan	Middle	25	25
		Henan	Zhoukou		Henan, 2006, Xia Shengli, 6	Henan	Middle	98	59	29
Xiong Wei	2003-2007	Chongqing			Chongqing, 2003-2007, Xiong Wei	Chongqing	SouthWest	119	104	15			Clinical study on the bacterial distribution, drug sensitivity and clinical significance in children with acute bacterial dysentery	Chongqing Medicine	Chinese
Xu Caiping	2008-2010	Shanghai	Minhang		Shanghai, 2008-2010, Xu Caiping	Shanghai	East	129	89	40			Serotype distribution and drug resistance of 129 Shigella strains	Occupation and Health	Chinese
Xu Guohui	2010-2012	Hebei	Chengde		Hebei, 2010-2012, Xu Guohui	Hebei	North	132	91	34	7		Analysis of drug resistance of 132 strains of Shigella	Chinese Journal of Clinicians	Chinese
Xu Jiancheng	2004-2006	Jilin			Jilin, 2004-2006, Xu Jiancheng	Jilin	NorthEast	66	58	8			Surveillance of bacterial resistance and distribution of 101 bacterial pathogens isolated from children with diarrhea	Maternal and Child Health Care of China	Chinese
Xu Peihua	2007	Zhejiang	Jiaxing	Haiyan	Zhejiang, 2007, Xu Peihua	Zhejiang	East	19	11	8			Investigation and drug resistance analysis of major pathogenic bacteria of bacterial infection causing diarrhea in Haiyan County	Chinese Journal of Health Laboratory Technology	Chinese
Xu Wei	2005-2008	Beijing	Beijing	Chaoyang	Beijing, 2005-2008, Xu Wei, 2	Beijing	North	113	58	55			Epidemiology of shigellosis in Chaoyang District Beijing 2004-2008	Disease Surveillance	Chinese
Xu Xuebin	2005	Shanghai			Shanghai, 2005, Xu Xuebin	Shanghai	East	644	425	219			Analysis of serrtype spectrum and antibiotics resistance characteristic of Salmonellae and Shigella isolated from patients with diarrhea in Shanghai	Chinese Journal of Zoonoses	Chinese
Xu Yuxian	2007-2009	Gansu	Lanzhou		Gansu, 2007-2009, Xu Yuxian	Gansu	NorthWest	27	21	6			Pathogen distribution and antibiotic resistance analysis in 683 patients with infectious diarrhea in Lanzhou area	Medical Journal of the Chinese People's Armed Police Forces	Chinese
Yan Bingxing	2007-2009	Henan	Puyang		Henan, 2007-2009, Yan Bingxing	Henan	Middle	275	158	91		26	Antimicrobial resistance in Shigella isolates from children under six years of age with acute diarrhea in Puyang City, 2007 to 2009	Chinese Journal of Health Laboratory Technology	Chinese
Yan Chun	2005	Zhejiang	Wenzhou	Rui'an	Zhejiang, 2005, Yan Chun	Zhejiang	East	21	19	2			Analysis of Shigella species distribution and drug resistance in children with infectious diarrhea	Journal of Wenzhou Medical College	Chinese
Yan Shanhuo	2006-2009	Guangxi	Qinzhou		Guangxi, 2006-2009, Yan Shanhuo	Guangxi	South	117	101	16			Analysis of pathogenic bacteria and drug resistance of children's diarrhea in Qinzhou	Laboratory Medicine and Clinic	Chinese
Yan Zhuolin	2008-2010	Zhejiang	Jiaxing	Tongxiang	Zhejiang, 2008-2010, Yan Zhuolin	Zhejiang	East	30	18	6	3	3	Current laboratory monitoring of bacillray dysentery in Tongxiang	Chinese Rural Health Service Administration	Chinese
Yang Haifei	2005-2011	Anhui			Anhui, 2005-2011, Yang Haifei	Anhui	East	308	260	40	3	5	Surveillance of Antimicrobial Susceptibility Patterns among Shigella Species Isolated in China during the 7-Year Period of 2005-2011	Analysis of Laboratory Medicine	English
Yang Hongli	2006-2007	Shanxi	Taiyuan		Shanxi, 2006-2007, Yang Hongli	Shanxi	North	19	14	5			Analysis of pathogenic surveillance of bacillary dysentery in a hostipal in Shanxi Province	Journal of Shanxi Medical College for Continuing Education	Chinese
Yang Ruijun	2007-2008	Zhejiang	Quzhou		Zhejiang, 2007-2008, Yang Ruijun	Zhejiang	East	60	34	26			Distribution of serotyping of Shigella in Quzhou from 2007 to 2008	Chinese Journal of Health Laboratory Technology	Chinese
Yang Tianchi	2005-2010	Zhejiang	Ningbo		Zhejiang, 2005-2010, Yang Tianchi	Zhejiang	East	70	38	32			Epidemiology of bacillary dysentery in Ningbo, Zhejiang, 2004-2011	Disease Surveillance	Chinese
Yang Yonghua	2005-2006	Inner Mongolia	Baotou		Inner Mongolia, 2005-2006, Yang Yonghua	Inner Mongolia	North	29	24	5			Etiological surveillance of infectious diarrhea in Baotou City during 2003-2006	Occupation and Health	Chinese
Yao Haiguang	2004-2010	Guizhou	Anshun	Pingba	Guizhou, 2004-2010, Yao Haiguang, 1	Guizhou	SouthWest	9	9				Epidemiological analysis on bacillary dysentery in Pingba County from 2004 to 2010	Chinese Journal of Pest Control	Chinese
Yao Haiguang	2004-2010	Guizhou	Guiyang	Kaiyang	Guizhou, 2004-2010, Yao Haiguang, 2	Guizhou	SouthWest	35	16	19			Epidemiological analysis on bacillary dysentery occurred in Kaiyang County between 2004 and 2010	Modern Preventive Medicine	Chinese
Yao Xueying	2009	Anhui	Hefei	Shushan	Anhui, 2009, Yao Xueying	Anhui	East	30	23	6		1	Distribution and Resistance of Shigella in the first affiliated hosptial of Anhui medical university	Anhui Medical Journal	Chinese
Ye Jinyan	2006-2009	Zhejiang	Jiaxing		Zhejiang, 2006-2009, Ye Jinyan	Zhejiang	East	60	48	12			Analysis on serotype distribution and antimicrobial resistance of Shigella isolates from Jiaxing	Chinese Journal of Nosocomiology	Chinese
Ye Weixiong	2005-2010	Guangdong	Shenzhen	Longgang	Guangdong, 2005-2010, Ye Weixiong	Guangdong	South	63	44	9	6	4	Epidemiological analysis of dysentery in Longgang District in 2005~2010	China Tropical Medicine	Chinese
You Lv	2009	Guizhou	Anshun	Pingba	Guizhou, 2009, You Lv, 1	Guizhou	SouthWest	6	6				Analysis of Shigella distribution and drug resistance in Guizhou 2009	Chinese Journal of Pest Control	Chinese
		Guizhou	Anshun	Ziyun	Guizhou, 2009, You Lv, 2	Guizhou	SouthWest	21	5	16
		Guizhou	Guiyang	Kaiyang	Guizhou, 2009, You Lv, 3	Guizhou	SouthWest	32	14	18
		Guizhou	Zhunyi	Tongzi	Guizhou, 2009, You Lv, 4	Guizhou	SouthWest	18		18
Yu Guohui	2007	Beijing	Beijing		Beijing, 2007, Yu Guohui	Beijing	North	35	12	21	2		Pathogenic bacteria surveillance of Children acute infectious diarrhea in 2007	Maternal and Child Health Care of China	Chinese
Yu Huali	2005	Anhui			Anhui, 2005, Yu Huali	Anhui	East	35	24	11			Analysis on the status of Shigella spp. Antimicrobial resistnace through data from the national shigellosis surveillance systerm in China, 2005	Chinese Jorunal of Epidemiology	Chinese
		Beijing			Beijing, 2005, Yu Huali	Beijing	North	44	22	21	1
		Fujian			Fujian, 2005, Yu Huali	Fujian	East	24	7	17
		Gansu			Gansu, 2005, Yu Huali	Gansu	NorthWest	26	26
		Guizhou			Guizhou, 2005, Yu Huali	Guizhou	SouthWest	13	13
		Henan			Henan, 2005, Yu Huali	Henan	Middle	131	127	4
		Qinghai			Qinghai, 2005, Yu Huali	Qinghai	NorthWest	38	32	6
		Shanxi			Shanxi, 2005, Yu Huali	Shanxi	North	16	15	1
		Shanghai			Shanghai, 2005, Yu Huali	Shanghai	East	412	292	120
Yu Lan	2005-2010	Heilongjiang			Heilongjiang, 2005-2010, Yu Lan, 1	Heilongjiang	NorthEast	84	64	20			Pathogenic mornitoring of bacillary dysentery in Heilongjiang Province from 2005 to 2010	Chinese Journal of Public Health Management	Chinese
Yu Qiuyan	2005	Shandong	Jinan		Shandong, 2005, Yu Qiuyan	Shandong	East	91	85	5		1	Analysis of dysentery epidemic in Jinan City in 2005	Preventive Medicine Tribune	Chinese
Yu Zhao	2004-2007	Zhejiang			Zhejiang, 2004-2007, Yu Zhao	Zhejiang	East	308	214	94			Analysis on epidemiological charasteristics of bacillary dysentery in Zhejiang Province, 2004-2007	Chinese Journal of Preventive Medicince	Chinese
Zeng Shulian	2003-2005	Hunan	Hengyang	Qidong	Hunan, 2003-2005, Zeng Shulian	Hunan	Middle	120	102	13	1	4	The distribution and drug resistance of Shigella in 120 patients in Qidong County of Hunan Province	China Tropical Medicine	Chinese
Zhang Chuanling	2006-2009	Zhejiang	Hangzhou	Xiaoshan	Zhejiang, 2006-2009, Zhang Chuanling	Zhejiang	East	151	64	85	1	1	Analysis of the distribution and resistance of 151 strains of Shigella group	Chinese Journal of Antibiotics	Chinese
Zhang Daitao	2010	Beijing	Beijing		Beijing, 2010, Zhang Daitao	Beijing	North	188	28	160			The investgation of pathogenic bacteria in diarrhea patients in Beijing in summer and autumn	Chinese Journal of Health Laboratory Technology	Chinese
Zhang Guangye	2005-2008	Gansu			Gansu, 2005-2008, Zhang Guangye	Gansu	NorthWest	366	200	164	2		Epidemic Shigella in Gansu Province, 2005-2008	Chinese Journal of Natural Medicine	Chinese
Zhang Guangye	2005-2011	Gansu			Gansu, 2005-2011, Zhang Guangye	Gansu	NorthWest	772	514	256	2		Anaylsis of variation and drug resistance of Shigella in Gansu Province during 2005-2011	Chinese Journal of Health Laboratory Technology	Chinese
Zhang Guangye	2006	Gansu	Lanzhou		Gansu, 2006, Zhang Guangye, 1	Gansu	NorthWest	49	42	7			Change of Shigella species and detection of drug resistance in Gansu Province	Scientific and Technical Information of Gansu	Chinese
			Wuwei	Liangzhou	Gansu, 2006, Zhang Guangye, 2	Gansu	NorthWest	36	34	2
Zhang Huayi	2005-2009	Qinghai			Qinghai, 2005-2009, Zhang Huayi	Qinghai	NorthWest	184	145	39			Analysis on the monitoring results of bacillary dysentery in Qinghai from 2005 to 2009	Modern Preventive Medicine	Chinese
Zhang J.	2006-2010	Shanghai			Shanghai, 2006-2010, Zhang J.	Shanghai	East	1435	630	805			Laboratory monitoring of bacterial gastroenteric pathogens Salmonella and Shigella in Shanghai, China 2006-2012	Epidemiology and Infection	English
Zhang Jianmin	2005-2010	Shanghai			Shanghai, 2005-2010, Zhang Jianmin	Shanghai	East	1090	465	625			Antimicrobial resistance of Shigella spp. from humans in Shanghai, China, 2004–2011	Diagnostic Microbiology and Infectious Disease	English
Zhang Jingbo	2005-2007	Beijing	Beijing	XiCheng	Beijing, 2005-2007, Zhang Jingbo	Beijing	North	103	65	38			Change in strain types and drug-susceptibility of Shigella in Xicheng District of Beijing from 2005 to 2007	Chinese Journal of Zoonoses	Chinese
Zhang Qinghui	2005-2007	Shanghai	Songjiang		Shanghai, 2005-2007, Zhang Qinghui	Shanghai	East	170	111	59			Epidemiological analysis on bacillary dysentery in Songjiang District of Shanghai from 2004 to 2007	Shanghai Journal of Preventive Medicine	Chinese
Zhang Rong	2006	Zhejiang	Hangzhou	Xiaoshan	Zhejiang, 2006, Zhang Rong, 1	Zhejiang	East	19	11	8			Serotypes and extended-spectrum beta-lactamase types of clinical isolates of Shigella spp. from the Zhejiang province of China	Diagnostic Microbiology and Infectious Disease	English
		Zhejiang	Shaoxing		Zhejiang, 2006, Zhang Rong, 2	Zhejiang	East	5		5
Zhang Shuren	2005	Shandong	Liaocheng		Shandong, 2005, Zhang Shuren, 1	Shandong	East	88	84	4			Change of species distribution and drug resistance of Shigella infections in a hosptial	Shanxi Medical Journal	Chinese
	2007	Shandong	Liaocheng		Shandong, 2005, Zhang Shuren, 2	Shandong	East	73	63	10
Zhang Wenli	2007	Beijing			Beijing, 2007, Zhang Wenli	Beijing	North	21	6	15			Wide dissemination of multidrug-resistant Shigella isolates in China	Journal of Antimicrobial Chemotherapy	English
	2008	Sichuan	Chengdu		Sichuan, 2008, Zhang Wenli	Sichuan	SouthWest	20	8	12
	2005-2009	Xinjiang	Urumuqi		Xinjiang, 2005-2009, Zhang Wenli	Xinjiang	NorthWest	150	140	10
Zhang Xiaoyu	2005-2007	Shaanxi	Xi'an		Shaanxi, 2005-2007, Zhang Xiaoyu	Shaanxi	NorthWest	37	27	7	2	1	Surveillance and analysis of bacterial pathogens of infectious diarrhea in the city of Xi'an from 2003 to 2007	Disease Surveillance	Chinese
Zhang Xiaoyu	2005	Shaanxi	Xi'an		Shaanxi, 2005, Zhang Xiaoyu	Shaanxi	NorthWest	17	12	4	1		Analysis on the surveillance result of diarrhea in the city of Xi'an in 2005	Disease Surveillance	Chinese
Zhang Xin	2009-2010	Beijing	Beijing		Beijing, 2009-2010, Zhang Xin	Beijing	North	552	154	398			Distribution and different serotypes and epidemiological characteristics of bacillary dysentery in Beijing from 2009 to 2011	Chinese General Practice	Chinese
Zhang Yinghua	2006-2011	Shanghai	Minhang		Shanghai, 2006-2011, Zhang Yinghua	Shanghai	East	212	132	80			Analysis of Bacterial Pathogens Causing Acute Diarrhea on the Basis of Sentinel Surveillance in Shanghai, China, 2006–2011	Japanese Journal of Infectious Disease	Chinese
Zhang Zhenquan	2005-2009	Beijing	Beijing	Yanqing	Beijing, 2005-2009, Zhang Zhenquan	Beijing	North	37	17	15	1	4	Epidemiological analysis for bacillary dysentery during 2005 to 2009 in Yanqing District of Beijing	Modern Preventive Medicine	Chinese
Zhao Jiayong	2008	Henan			Henan, 2008, Zhao Jiayong	Henan	Middle	272	250	22			Etiology of shigellosis in Henan Province, 2008	Disease Surveillance	Chinese
Zhao Ying	2006-2009	Beijing	Beijing	Daxing	Beijing, 2006-2009, Zhao Ying	Beijing	North	34	21	13			Analysis of infectious diarrhea of multiple pathogen surveillance in Daxing District in Bejing	Chinese Journal of Health Laboratory Technology	Chinese
Zhong Haojie	2007	Anhui			Anhui, 2007, Zhong Haojie	Anhui	East	33	28	5			Analysis on bacillary dysentery surveillance data collected from the national surveillance system in 2007	Chinese Jorunal of Epidemiology	Chinese
		Beijing			Beijing, 2007, Zhong Haojie	Beijing	North	81	29	51		1
		Fujian			Fujian, 2007, Zhong Haojie	Fujian	East	16	9	7
		Gansu			Gansu, 2007, Zhong Haojie	Gansu	NorthWest	164	33	131
		Guizhou			Guizhou, 2007, Zhong Haojie	Guizhou	SouthWest	33	3	28	2
		Henan			Henan, 2007, Zhong Haojie	Henan	Middle	216	199	17
		Heilongjiang			Heilongjiang, 2007, Zhong Haojie	Heilongjiang	NorthEast	16	12	4
		Qinghai			Qinghai, 2007, Zhong Haojie	Qinghai	NorthWest	23	15	8
		Shanxi			Shanxi, 2007, Zhong Haojie	Shanxi	North	54	40	14
		Shanghai			Shanghai, 2007, Zhong Haojie	Shanghai	East	168	91	77
Zhou Cuiyu	2005-2009	Gansu	Lanzhou		Gansu, 2005-2009, Zhou Cuiyu	Gansu	NorthWest	456	264	126	35	31	Surveillance of baicllary dysentery in Chengguan District, Gansu Province from 2005 to 2009	Health Vocational Education	Chinese
Zhou Limin	2010	Beijing	Beijing	Daxing	Beijing, 2010, Zhou Limin	Beijing	North	56	4	52			Monitoring on infectious diarrheal disease in Daxing District of Beijing, 2010-2011	Capital Journal of Public Health	Chinese
Zhou Xiaohong	2007	Zhejiang	Jiaxing	Haiyan	Zhejiang, 2007, Zhou Xiaohong	Zhejiang	East	20	12	8			Analysis of distribution and drug resistance of Shigella and Salmonella in 2007 in Haiyan County	Chinese Journal of Health Laboratory Technology	Chinese
Zhou Xiaohong	2005-2010	Zhejiang	Jiaxing	Haiyan	Zhejiang, 2005-2010, Zhou Xiaohong	Zhejiang	East	64	28	36			Analysis on distribution of Shigella serotypes and drug resistance in Haiyan County	Zhejiang Preventive Medicine	Chinese
Zhou Yiheng	2006-2010	Liaoning	Dalian		Liaoning, 2006-2010, Zhou Yiheng	Liaoning	NorthEast	21	9	12			Epidemic analysis of shigellosis in Dalian City in Liaoning Province, 2006-2010	Disease Surveillance	Chinese
Zhu Liqin	2010	Jiangsu	Suzhou		Jiangsu, 2010, Zhu Liqin	Jiangsu	East	38	26	12			Analysis on serotype and antimicrobial resistance of Shigella during 2010-2011 in Suzhou	Jiangsu Journal of Preventive Medicine	Chinese
Zhu Meijuan	2006-2010	Beijing	Beijing	Shunyi	Beijing, 2006-2010, Zhu Meijuan	Beijing	North	44	19	25			Surveillance and drug resistance of bacillary dysentery in Shunyi District, Beijing from 2006 to 2012	Chinese Journal of Health Laboratory Technology	Chinese
Zhu Qiufeng	2005-2006	Anhui	Huaibei		Anhui, 2005-2006, Zhu Qiufeng	Anhui	East	149	143	6			Distribution and resistance of 149 strains of Shigella in Huaibei City	Jiangsu Journal of Preventive Medicine	Chinese
Zhu Xiaoyun	2005-2006	Shandong	Linyi		Shandong, 2005-2006, Zhu Xiaoyun, 2	Shandong	East	116	87	26	2	1	Ivestigation and analysis of pathogenic bacteria in infectious diarrhea in Linyi City	Occupation and Health	Chinese
Zhuang Ailing	2008-2010	Shandong	Qingdao		Shandong, 2008-2010, Zhuang Ailing	Shandong	East	269	197	59	13		Detection and analysis of pathogenic bacteria in outpatients with infectious diarrhea	Qingdao Medical Journal	Chinese
Zhuang ling	2007	Jiangsu			Jiangsu, 2007, Zhuang ling	Jiangsu	East	214	177	37			Epidemilogical analysis of bacillary dysentery in Jiangsu Province in 2007	Modern Medical Journal	Chinese
